1

2

3 **Evidence that interspecies *Leishmania* hybrids contribute to changes**  
4 **in disease pathology**

5

6

7

8

9 Patrick Lypaczewski<sup>1</sup> and Greg Matlashewski<sup>1\*</sup>

10 <sup>1</sup>: Department of Microbiology and Immunology, McGill University. 3775 University St, H3A  
11 2B4, Montreal, Canada.

12 \*: Corresponding author: [greg.matlashewski@mcgill.ca](mailto:greg.matlashewski@mcgill.ca)

13

## 14 **Abstract**

## 15 **Background**

16 Leishmaniasis is a widespread neglected tropical disease present in over 90 countries with diverse  
17 pathologies associated with different species of *Leishmania* parasites transmitted by infected sand  
18 flies. *Leishmania donovani* causes visceral leishmaniasis, a highly virulent fatal infection of the  
19 visceral organs. *Leishmania major* and *Leishmania tropica* cause less virulent cutaneous  
20 leishmaniasis where the infection remains in the skin at the site of the sandfly bite. A major  
21 molecular epidemiological question is why some variants of *L. donovani* in Sri Lanka cause  
22 cutaneous disease rather than the typical visceral disease.

## 23 **Methods**

24 Whole genome sequencing data for 684 *L. donovani* samples was used to perform sequence  
25 alignments and worldwide phylogenetic analyses to determine the source of the atypical *L.*  
26 *donovani* strains from Sri Lanka. *L. donovani* genome sequences originating from Sri Lanka  
27 were further analyzed for evidence of hybridization with other *Leishmania* species by determining  
28 the density of heterozygous alleles. Polymorphisms from potential *Leishmania* hybrids were used  
29 to reconstruct the parental genetic sequences to identify the potential parental species and quantify  
30 their genetic contribution through sequence comparison of the reconstructed parental sequences  
31 with all Old World *Leishmania* genomes.

## 32 **Findings**

33 Here we show that *L. donovani* in Sri Lanka contains genes with widespread gene polymorphisms  
34 derived from African *L. major* and *L. tropica* genomes that were likely obtained as a result of  
35 diploid genome hybridization and recombination resulting in progeny with mosaic genomes.

36 Furthermore, evidence is presented that multiple *L. donovani* hybrid parasites originating from  
37 visceral leishmaniasis endemic Africa have entered Sri Lanka yet visceral leishmaniasis remains  
38 non-existent raising the possibility that environmental factors favour the establishment of atypical  
39 *L. donovani* strains in Sri Lanka.

#### 40 **Interpretation**

41 The discovery of *L. major* and *L. tropica* genome sequences in *L. donovani* provides a compelling  
42 rationale how some *L. donovani* strains in Sri Lanka may be able to cause cutaneous rather than  
43 visceral leishmaniasis. The identification of *L. donovani* hybrid parasites in cutaneous  
44 leishmaniasis lesions provides a unique opportunity to investigate environmental and parasite  
45 genetic factors controlling disease epidemiology and pathogenesis.

#### 46 **Funding**

47 Canadian Institutes of Health Research and Fonds de recherche du Québec – Santé

48

49

## 50 **Research in context**

### 51 **Evidence before this study**

52 Different *Leishmania* species parasites cause either benign cutaneous leishmaniasis or fatal  
53 visceral leishmaniasis. It is unknown why some variants of *Leishmania donovani* that typically  
54 causes visceral leishmaniasis in Asia and Africa can cause cutaneous leishmaniasis in specific  
55 geographic locations including Sri Lanka. *Leishmania* has a diploid genome and hybrid parasites  
56 have been identified in nature and generated experimentally. In the context of this study, hybrids  
57 are considered to be progeny derived from a single outcross event between two diverse parents.  
58 Uncertainty remains whether interspecies hybrids with visceral and cutaneous leishmaniasis  
59 causing species in nature are associated with different disease outcomes.

### 60 **Added value of this study**

61 Evidence for genetic hybridization between visceral and cutaneous disease causing *Leishmania*  
62 species is described from Sri Lanka where cutaneous leishmaniasis is highly endemic yet there is  
63 no ongoing visceral leishmaniasis transmission. This provides a potential explanation how *L.*  
64 *donovani* can become attenuated for visceral disease and could help to identify geographic  
65 environmental factors associated with selection for parasite attenuation.

### 66 **Implications of all the available evidence**

67 Hybrid *Leishmania* parasites may be one source of atypical cutaneous leishmaniasis.  
68 Epidemiological studies are needed to determine why diverse *L. donovani* hybrid parasites have  
69 become ubiquitous in specific geographic locations where the incidence of cutaneous  
70 leishmaniasis is increasing. This has implications for understanding the genetic control of disease  
71 pathogenesis and for the prevention of cutaneous or visceral leishmaniasis locally and in  
72 neighboring countries.

## 73 **Introduction**

74 Leishmaniasis is a neglected tropical disease present throughout the tropics and subtropics and is  
75 caused by the protozoan parasite from the genus *Leishmania* that is transmitted by infected sand  
76 flies<sup>1,2</sup>. There are two major pathologic forms associated with leishmaniasis; cutaneous  
77 leishmaniasis results in skin lesions at the site of the sand fly bite that usually self-heal within  
78 several weeks or months, and the more virulent form, visceral leishmaniasis where *Leishmania*  
79 infects the visceral organs and is fatal if not treated. Visceral leishmaniasis is the second most  
80 deadly vector borne parasitic diseases after malaria<sup>2,3</sup>. The highest incidence of visceral  
81 leishmaniasis is in South East Asia and Sub-Saharan Africa where the predominant etiologic agent  
82 is *L. donovani* transmitted by *Phlebotomus spp* sand flies and humans are the only known  
83 reservoir<sup>2,3</sup>. Cutaneous leishmaniasis is more widespread internationally than visceral  
84 leishmaniasis and is caused by numerous *Leishmania* species, all of which have animal reservoirs  
85 with the exception of *L. tropica* that has mainly human reservoirs with some animal reservoirs<sup>2,4</sup>.  
86 Hybrids between related parasites from the *L. donovani* complex strains have been described<sup>5-9</sup>  
87 and there is evidence for hybrids between distant species such as *L. infantum* and *L. major* among  
88 natural isolates<sup>10-13</sup>. In the context of this study, hybrids are considered to be progeny derived from  
89 a single outcross event between two diverse parents. Experimentally, inter- and intraspecies  
90 hybrids have been generated in the sand fly vector, confirming that the promastigote stage of  
91 *Leishmania* can form hybrids and carry out genetic exchange<sup>14-17</sup>. More recently, classical  
92 chromosome crossing over during meiotic-like recombination and the ability to experimentally  
93 conduct backcrosses with F1 progeny has been demonstrated with intraspecies hybrids in sand  
94 flies<sup>18</sup>. These observations confirm that intra and inter-species genetic exchange can occur both  
95 experimentally and in nature. Uncertainty remains however to what extent interspecies hybrids can

96 contribute to the rise of parasites with different epidemiology and pathogenesis in nature, such as  
97 for example *L. donovani* and *L. major* hybrids associated with cutaneous leishmaniasis.

98 Cutaneous leishmaniasis has recently become endemic in Sri Lanka and there have been over  
99 15,000 cases since 2001 with over 3000 reported cases in 2018<sup>19,20</sup>. In contrast, there have been  
100 only 7 suspected cases of visceral leishmaniasis in Sri Lanka since 2004 mostly in individuals with  
101 co-morbidities associated with immunosuppression<sup>21</sup>. No confirmed cases of visceral  
102 leishmaniasis from Sri Lanka have ever been reported to the WHO<sup>22</sup>. Cutaneous leishmaniasis in  
103 Sri Lanka is unique and interesting because it is caused by *L. donovani* which typically causes  
104 visceral leishmaniasis in other countries, although recently cutaneous leishmaniasis caused by *L.*  
105 *donovani* has also been observed in some regions of India and Nepal<sup>20,23</sup>.

106 Ongoing research in our laboratory has identified a number of non-synonymous single nucleotide  
107 polymorphisms (SNPs) and copy number variations in a Sri Lankan *L. donovani* isolate causing  
108 cutaneous leishmaniasis<sup>24,25</sup>. These genetic changes have resulted in biological changes in the  
109 conserved mTOR signalling pathway and a reduction in A2 virulence genes that in addition to  
110 other unidentified mechanisms, contribute to the atypical cutaneous leishmaniasis phenotype of *L.*  
111 *donovani* in Sri Lanka<sup>24,25</sup>. More recently, genome sequences from additional *L. donovani* isolates  
112 from Sri Lanka have been reported and deposited in NCBI GenBank<sup>26</sup>. Interestingly, these newer  
113 isolates did not contain any of the sequence variations and SNPs that we previously identified in  
114 the cutaneous leishmaniasis isolate<sup>24,25</sup> suggesting the presence of multiple co-existing *L. donovani*  
115 strains in Sri Lanka. It was therefore necessary to investigate the origin of the *L. donovani* strains  
116 in Sri Lanka to understand the etiologic origin of cutaneous leishmaniasis on this island.

117 Results from this study demonstrate that the *L. donovani* genomes from some strains present in Sri  
118 Lanka were remarkably divergent, and evidence is presented here that this is largely due to the

119 presence of parasites with hybrid- genomes including *L. donovani/L. major* and *L. donovani/L.*  
120 *tropica* hybrids. These findings provide one possible explanation for the atypical cutaneous  
121 leishmaniasis phenotype in Sri Lanka.

## 122 **Results**

### 123 **Global distribution of *L. donovani* sequences and the divergence of strains from Sri Lanka**

124 To understand the geographic origins of the *L. donovani* strains circulating in Sri Lanka, we  
125 compared their genomes to all available *L. donovani* genomes in GenBank<sup>27</sup> including relevant  
126 recent contributions<sup>28</sup>. The entirety of the NCBI GenBank/Sequencing Read Archive (SRA)  
127 records for *L. donovani* were data mined as detailed in Methods. As shown in Figure 1A, only  
128 whole genome sequencing projects with sufficient quality were included to generate variant  
129 profiles for comparative genomics and phylogeny analysis. From the resulting 684 filtered genome  
130 sequences, a neighbor-joining phylogenetic tree was generated as shown in Figure 1B. The tree  
131 generated in Figure 1B is also available in an interactive format with branches identified by their  
132 GenBank SRA accession codes at <https://itol.embl.de/tree/1322162673368791580134755>, and the  
133 accession codes also listed in Supplementary Table S1. The available sequences from the Sri Lanka  
134 *L. donovani* isolates formed three distinct groups termed SL1, SL2 and SL3. The SL1 group was  
135 closer to the Indian subcontinent group and was comprised of strains originally isolated from Sri  
136 Lanka almost 10 years ago<sup>24,25</sup>, as well as sequences from an independent group (NCBI BioProject  
137 PRJEB2600). Five of the Sri Lankan *L. donovani* genomes clustered in SL2 were much further  
138 than any other *L. donovani* cluster from the Indian subcontinent or from Africa. Three genomes  
139 clustered in the SL3 group and were on the edge of the Sudanese/North-Ethiopian *L. donovani*  
140 cluster. This demonstrates that the Sri Lanka isolates in groups SL2 and SL3, despite being  
141 geographically close to India, are quite different in origin from the SL1 group and that the SL2

142 group is very unique from any other *L. donovani* strain. All Indian subcontinent (ISC) genomes  
143 cluster closely together including the slightly divergent ISC1 or “Yeti” group consistent with  
144 previous phylogenetic analyses<sup>29,30</sup>. Parasites from Africa formed three separate clusters, largely  
145 determined by their geographical isolation location, as previously reported<sup>7</sup>. Parasites from the  
146 north of Ethiopia and Sudan formed a cluster distinct from southern Ethiopian and Kenyan clusters  
147 with hybrid parasites between the north and south of Ethiopia forming a small intermediate cluster  
148 (highlighted in blue)<sup>6-9,31</sup>.

149 As one of the Sri Lankan groups (SL2) diverged more than the African to Indian genetic distances  
150 based on branch length (Fig. 1A), we manually inspected the alignments to investigate how this  
151 may have occurred. It became apparent that the genomes from the SL2 group were heavily  
152 populated with SNPs occurring in the 40-60% frequency range and this was not the case for the  
153 SL1 and SL3 groups. For clarity, a representative example of these types of SNPs is shown for a  
154 40 bp section of chromosome 1 (Fig. 2A). The frequency of SNPs is also shown for the entire  
155 chromosome 1 (Supplementary Figure S1A) and across the entire genome (Supplementary Figure  
156 S1B, S1C, Supplementary Table S2). These data show the different levels of heterozygosity across  
157 the entire genome for groups SL1, SL2 and SL3 with group SL2 in the 50% frequency range for  
158 diploid chromosomes while group SL3 genomes contain mainly homozygous polymorphisms  
159 located on the outer edge of each track. The high frequency heterozygosity in the 50% range was  
160 atypical and could represent regions with equal contributions from homologous chromosomes  
161 from different parasite genomes and could explain why the SL2 group is phylogenetically very  
162 different from other *L. donovani* strains.

163 To compare the overall level of heterozygosity in the Sri Lankan groups to other *L. donovani*  
164 strains, all 684 genomes used to generate the phylogeny tree in Figure 1 were aligned to the *L.*



165 *donovani* reference genome sequence<sup>24</sup> and variant sites were analysed using the VarScan2  
166 software<sup>32</sup>. The frequency of heterozygous vs homozygous SNPs across the entire genome was  
167 calculated for each isolate to determine the level of heterozygosity for each *L. donovani* genome  
168 in the NCBI database. The ratios of heterozygous SNPs were plotted for all the sequenced *L.*  
169 *donovani* isolates and are shown in Figure 2B. A group of isolates originating from Ethiopia were  
170 considered separately as these were previously reported to be intra-species hybrids of two distinct  
171 *L. donovani* populations and therefore served as a benchmark for hybrid parasites<sup>7,8,31</sup>. The  
172 Ethiopian hybrid *L. donovani* isolates are highlighted in blue in Figure 2B. As shown in red, all  
173 isolates from the SL1 group fall within the normal distribution of heterozygous polymorphisms  
174 for *L. donovani*. All five isolates from the Sri Lanka SL2 group have a high ratio of heterozygous  
175 SNPs above the known hybrid group from Ethiopia. In comparison, all three isolates from the SL3  
176 group are close to the overall distribution of *L. donovani* isolates. Due to the distance and the high  
177 heterozygous SNP frequency of the SL2 group compared to the entire *L. donovani* global  
178 population (Fig.1B, Fig.2B, Supp. Fig. S1), we investigated the possibility that these were  
179 interspecies hybrid parasites.

### 180 **Cutaneous disease-associated *Leishmania* species contribute hybrid parental genomes**

181 Highly heterozygous SNPs were of interest because they could be derived from non-*L. donovani*  
182 species. To investigate this possibility, nucleotides corresponding to the site of each SNPs were  
183 altered to correspond to the non-*L. donovani* reference nucleotide to reconstruct the genes  
184 contributed by a potential non-*L. donovani* parent as outlined in Figure 3A. The reconstructed  
185 genomes were then compared to all Old World reference *Leishmania* strains available on  
186 TriTrypDB<sup>33</sup> using BLAST. To validate this methodology, a previously reported hybrid parasite  
187 between *L. major* and *L. infantum* (IMT211) was used as a positive control test assay<sup>11</sup> while the

188 SL1 non-hybrid group previously characterized<sup>24,25</sup> serves as an internal negative control. As  
189 shown in Figure 3B, the reconstructed genes using the non-reference nucleotides polymorphisms  
190 from the control sample (IMT211) matched almost entirely *L. major* confirming that this method  
191 of analysis can quantify the sequence contributions from the non-*L. donovani* parent at the whole  
192 genome level.

193 Using the above method of analysis, the reconstructed genomes from the SL1 group matched  
194 almost exclusively to members of the *L. donovani* species complex<sup>24</sup>. Analysis of the reconstructed  
195 genomes from the highly heterogenous SL2 group however revealed that the SRR6257364 isolate  
196 had SNPs of *L. major* origin in almost half its genome and SRR6257365 contained SNPs of *L.*  
197 *major* origin in about 20% of its genome (Table 1, Figure 4A, SL2 A, red). Moreover, the  
198 reconstructed genes from samples SRR6257366, SRR6257367 and SRR6257369 matched mostly  
199 the *L. tropica* reference genome (Table 1, Figure 4A, SL2 B, green). In comparison, the SL3 group  
200 (Isolates SRR6257368, SRR6257370, SRR6257371) that clustered closer to the African strains  
201 (Fig. 1B), contained very few reconstructed gene matches outside of the *L. donovani* complex (*L.*  
202 *donovani/L. infantum*) (Table 1, Figure 4A, SL3, blue). For clarity, only the *Leishmania* species  
203 with gene matches are shown, the complete Old World species gene comparison is shown in  
204 Supplementary Fig S2.

205 The above analysis identified genes originating from different reference *Leishmania* species. We  
206 next used this methodology to attempt to further narrow the origins of the hybrid genes present in  
207 the Sri Lankan isolates. As shown in Figure 4B and Table 2, the SL1 group matched mostly with  
208 the reference sequences from Sri Lankan and Nepal, while the non-*L. donovani* parent from the *L.*  
209 *major* hybrids classified as group SL2 A (SRR6257364, SRR6257365) was more related to *L.*  
210 *major* strain SD75 (isolated from Senegal) than to *L. major* strain LV39 (Isolated from Uzbekistan)

211 or the reference *L. major* Friedlin strain (isolated from Israel). As there is only one reference *L.*  
212 *tropica* strain, samples SRR6257366, SRR6257367 and SRR6257369 (SL2 B) all clustered to this  
213 one reference. With respect to the SL3 group, the reconstructed genes from SRR6257368,  
214 SRR6257370 and SRR6257371 were almost exclusively derived from the African LdLV9  
215 reference strain<sup>34</sup>.

216 As *L. tropica* and *L. major* are genetically closely related, we manually inspected some of the  
217 generated alignments to confirm that it was possible to accurately assign the reconstructed genes  
218 as belonging to either *L. tropica* or *L. major*. As in the representative alignment in Figure 4C, the  
219 polymorphisms between the *L. tropica* and *L. major* hybrids were frequent enough to be  
220 discriminatory. As *L. major* and *L. tropica* parasites are not present in Sri Lanka, and considering  
221 the phylogenetic tree shown in Figure 1B, it is likely that the hybrids originated in East Africa and  
222 subsequently imported into Sri Lanka from infected individuals.

223 To verify the possibility that SL2 groups contained genetic material originating from *L. major*  
224 and *L. tropica*, we performed an additional genetic comparison and phylogeny analysis including  
225 sequences from *L. major* and *L. tropica*. As shown in Supplementary Figure S3, all SL2 isolates  
226 are placed at various distances along the same branch as *L. major* and *L. tropica*. Further, this  
227 branch containing the putative inter-species hybrids and cutaneous species is shown to originate  
228 from the African *L. donovani* lineages.

229 We also investigated whether it was possible to separate the haplotypes by separating the reads  
230 originating from chromosomes with different species origins through read-based phasing to  
231 further verify the identification of species by the BLAST analysis described above. This was  
232 however complicated by chimeric phase sets, likely due to insufficient coverage. As shown in  
233 Supplementary Figure S4A, SNP dense regions originating from the *L. major* parent of the

234 hybrid phased in this alignment are assigned alternatively to the different phases rather than  
235 remaining continuous. Nevertheless, phasing of a short segment on chromosome 1 followed by  
236 phylogenetic analysis was consistent with the BLAST comparison approach as outlined in Figure  
237 3A. As shown in Supplementary Figure S4B, the haplotypes originating from the SL2A and  
238 SL2B isolates clustered on opposite branches between *L. donovani/L. major* and *L. donovani/L.*  
239 *tropica* respectively, consistent with the BLAST analysis of the origin of the non-*L. donovani*  
240 hybrid parent.

#### 241 **Chromosomal recombination in *L. donovani* hybrid strains**

242 We next investigated whether there was evidence for recombination between *L. donovani* and *L.*  
243 *major* homologous chromosomes. As shown in a representative alignment of the two SL2A *L.*  
244 *donovani/L. major* hybrids for the same section of chromosome 19, blocks of nucleotides  
245 consisting of homozygous *L. donovani* sequences and heterozygous *L. donovani/L. major*  
246 sequences were evident (Figure 5A). This pattern of mixed or single parental origin sequences can  
247 be seen for the SL2 isolates throughout all the chromosomes as shown in the example of  
248 chromosome 36 (Figure 5B) and the whole genome (Supplementary Fig S5).

#### 249 ***L. donovani* isolates with low heterozygosity (SL3 group) contain *L. major* SNPs and has** 250 **conserved aneuploidy**

251 While the five SL2 isolates were highly heterozygous with a large fraction of SNPs matching the  
252 *L. tropica* or *L. major* genomes, the three SL3 isolates contained a low level of heterozygosity  
253 (Fig. 2B). We therefore investigated whether other genomic alterations were present that could  
254 explain the common phenotype of these variants. Upon close inspection, these isolates also  
255 contained some short regions with polymorphisms in common with *L. major*. In contrast, the

256 sequences from the SL1 isolates contained no detectable polymorphisms in common with *L. major*.  
257 Although most of the polymorphisms in the SL3 group were no longer present at 50% allele  
258 frequency (diploid heterozygous), many of the polymorphisms were in common with the SL2  
259 group as shown in this representative section of chromosome 6 (Figure 6A). Further, some of the  
260 SNPs are retained without a loss of allele frequency to match the *L. major* sequence.  
261 Supplementary Table S2 contains a list of genes with *L. major* non-synonymous polymorphisms  
262 retained in all samples of the SL3 group.

263 Modulation of aneuploidy and unequal crossing over has been shown to be an evolutionary  
264 mechanism employed by *Leishmania*<sup>35,36</sup>. As the SL3 group showed evidence of ancient  
265 hybridization with *L. major* sharing polymorphic sites with the SL2 group (Figure 6A), we  
266 therefore investigated whether the SL2 and SL3 groups shared other features including conserved  
267 aneuploidy across the hybrid subgroups. Genome sequencing coverage was compared to determine  
268 the chromosome copy numbers. As shown in Figure 6B, the SL2A (*L. major/L. donovani* hybrids)  
269 and SL3 (*L. major/L. donovani* ancient hybrids) isolates have a conserved aneuploidy pattern  
270 consisting of a decreased copy number of chromosome 2 (red arrow) and an increased copy  
271 number of chromosomes 22 and 26 (blue arrows). Note also that chromosome 31 is tetraploid in  
272 all *Leishmania* species and serves here as a reference for an increased copy number chromosome.  
273 The SL2B isolate (*L. tropica/L. donovani* hybrids) shown in Figure 6B (and also in Supplementary  
274 Figure S5) does not share the decreased copy number for chromosome 2 and appears to have a  
275 unique increase in copy number of chromosome 21 and an increase of chromosomes 22 and 26  
276 shared with the SL2A and SL3 groups. For comparison to SL2A and SL3, only one SL2B isolate  
277 is shown in Figure 6B and all three SL2B isolates are consistent and shown in Supplementary

278 Figure S5. Overall, these observations show that there are similarities between the SL2A and SL3  
279 groups with respect to conservation of polymorphisms and pattern of aneuploidy.

## 280 Discussion

281 This study presents evidence that hybrid *L. donovani/L. major* and *L. donovani/L. tropica* parasites  
282 are associated with cutaneous leishmaniasis in Sri Lanka. Although this is an important  
283 observation, it is also remarkable that multiple atypical *L. donovani* hybrids (SL2 and SL3 groups)  
284 and non-hybrids (SL1)<sup>24,25</sup> associated with cutaneous leishmaniasis culminate in Sri Lanka  
285 concomitant with the exclusion of visceral leishmaniasis that is now virtually non-existent<sup>20</sup>. As  
286 *L. major* and *L. tropica* parasites are not present in Sri Lanka, and considering the phylogenetic  
287 trees shown in Figure 1B and Supplementary Fig S3, it is likely that the hybrids originated in East  
288 Africa and were subsequently imported into Sri Lanka from infected individuals. Once in Sri  
289 Lanka, there appears to be an environmental selection for propagation of these atypical *L. donovani*  
290 parasites that cause cutaneous leishmaniasis in the local population.

291 It will be interesting to investigate the vector and potential non-human reservoirs that selects for  
292 such atypical *L. donovani* strains since virtually all human cutaneous leishmaniasis causing species  
293 outside of Sri Lanka have an animal reservoir. Notably, the probable vector *L. donovani* in Sri  
294 Lanka is *P. argentipes* subspecies *glaucus* that has a preference for animal rather than human  
295 blood. This differs from *P. argentipes* subspecies *sensu lato* the vector for *L. donovani* in India,  
296 that is anthropophilic<sup>37</sup>. Further, this is also different from the *P. orientalis* and *P. alexandri* vectors  
297 of *L. donovani* in Africa<sup>7</sup> and as inter-species hybridization has previously been shown to confer  
298 increased vector competence to hybrid parasites<sup>38</sup>, the hybrids described herein could benefit from  
299 a wider permissive vector repertoire.

300 Starting from an original outcross hybridization with *L. donovani*, subsequent replication through  
301 mitosis or a combination of mitosis and meiosis involving cross over events potentially resulted  
302 in the retention of genetic information from *L. major* or *L. tropica*. This is consistent with the  
303 observation that recombination can occur in the progeny of *L. donovani* complex parasites as was  
304 demonstrated for the *L. infantum* and *L. donovani* hybrid associated with cutaneous leishmaniasis  
305 in Turkey<sup>5</sup>.

306 These observations are also in agreement with the proposed model of mosaic aneuploidy<sup>35</sup>  
307 recently supported by whole genome sequencing data<sup>36</sup> where *Leishmania* can discard deleterious  
308 or retain beneficial alleles. Indeed, recent research shows the genome of *Leishmania* is highly  
309 dynamic during replication resulting in a high genomic diversity across the pooled population<sup>35,36</sup>.  
310 Through this process, progeny with a combination of *L. major* or *L. tropica* alleles with *L.*  
311 *donovani* alleles can arise if they possess a fitness advantage for propagation in a particular  
312 environment.

313 Whole genome sequence analysis of *L. donovani* causing cutaneous leishmaniasis strains  
314 originally isolated from Sri Lanka were however not hybrid parasites and contain 83 gene  
315 mutations including altered A2 virulence genes and a polymorphism in the RagC gene from the  
316 mTOR signalling pathway<sup>24,25,39</sup>. None of these originally identified 83 genes mutations were  
317 present in the more recently sequenced *L. donovani* strains from Sri Lanka included in this analysis  
318 (GenBank ID PRJNA413320)<sup>26</sup>. This argues that there are diverse mechanisms for *L. donovani* to  
319 lose virulence for causing visceral disease in Sri Lanka and become associated with the less  
320 virulent cutaneous disease and these include genetic changes within the *L. donovani* genome<sup>24, 25</sup>  
321 and potentially as demonstrated within, propagation of *L. donovani* hybrid strains with *L. major*  
322 and *L. tropica*.

323 Parasites were also identified that contained relatively small amounts of hybrid gene  
324 polymorphisms in the SL3 group suggesting that introgression was more ancient in SL3 than SL2  
325 resulting in fewer polymorphic alleles. This is essentially a natural selection experiment where  
326 heterozygosity is reduced by the removal of SNPs that are not beneficial and the retention of SNPs  
327 that result in more fit parasites for the Sri Lankan environment. Supplementary Table S2 contains  
328 those genes that have retained *L. major* non-synonymous SNPs despite having low levels of  
329 heterozygosity. Some of these genes could have been selectively retained during propagation in  
330 Sri Lanka and functional analysis of these genes could identify their role in disease tropism.  
331 Nevertheless, none of the genes in Supplementary Table S2 are in common with the mutant genes  
332 from the non-hybrid SL1 group<sup>24,25</sup> consistent with the argument that there are multiple  
333 mechanisms for genotypic changes in *L. donovani* to mediate cutaneous leishmaniasis.

334 Interestingly, while the patterns of polymorphisms appear varied across the isolates, the  
335 aneuploidy seen in the SL2 and SL3 parasites appears to be more conserved (Fig. 6A, B)  
336 suggesting an external pressure is driving those parasites away from a normal diploid genome.  
337 Polymorphisms identified above may be further narrowed by prioritizing polymorphisms retained  
338 on chromosomes presenting an unusual ploidy pattern.

339 The evidence presented herein for the existence of 4 different populations of *L. donovani* parasites  
340 in Sri Lanka (SL1, SL2A, SL2B and SL3) could help reconcile differences in lesion  
341 morphology<sup>40,41</sup>, spatial distribution<sup>20</sup> and drug susceptibility<sup>26</sup> previously reported across Sri  
342 Lanka. Indeed, parasites causing lesions that share features of *L. major* or *L. tropica* infection<sup>40</sup> or  
343 with variable tolerance to sodium stibogluconate<sup>26</sup> could consist of different *L. donovani* hybrids  
344 with varying amount of genes from either *L. major* or *L. tropica* as they have different pathological  
345 features<sup>42</sup> and drug sensitivity<sup>43</sup>. Further, these co-existing populations supports both theories of



346 recent introduction or prolonged existence of endemic *L. donovani* parasites in Sri Lanka<sup>20</sup>. It  
347 would be interesting to compare the pathology caused by SL2 and SL3 group parasites or the *L.*  
348 *major* vs *L. tropica* hybrids as these different parasites could be responsible for the different  
349 cutaneous disease profiles identified between the North and South parts of the island<sup>40</sup>.

350 Genetic comparison of the genome of *L. donovani* origin in those hybrids is most similar to the  
351 LV9 strain of Ethiopian origin<sup>34</sup> rather than the reference Sri Lankan or Indian/Nepalese sequences  
352 while also assigning the genomic sequences of *L. major* origin to a Senegalese reference (Table 2,  
353 Fig. 1B, Supplementary Fig S3, Fig. 4B). *L. donovani* parasites from Ethiopia have previously  
354 formed intra-species hybrid parasites between the divergent northern and southern populations<sup>6-9</sup>.  
355 Further, studies on *L. tropica* have identified intra-species hybridization<sup>44</sup> and *L. major* hybrids  
356 have previously been isolated<sup>11</sup> indicating these two parasite species are amenable to the  
357 generation of hybrid progeny. This study however provides novel evidence through whole genome  
358 analysis for the generation of natural *L. donovani* hybrids with *L. major* and *L. tropica*. Both *L.*  
359 *tropica* and *L. major* are present in Ethiopia in similar animal populations along with their sandfly  
360 vectors<sup>45</sup>. Not only is *L. tropica* present in Ethiopia, but it was also reported to share similar  
361 possible animal reservoirs with *L. donovani* in Ethiopia<sup>46</sup>. Taken together, it is feasible that *L.*  
362 *donovani* parasites from Ethiopia could generate hybrid parasites with *L. tropica* and *L. major*.  
363 These hybrids could have entered Sri Lanka as suggested by the grouping of SL3 parasites in the  
364 North-Ethiopian/Sudanese cluster (Fig. 1B, Supplementary Fig S3).

365 Sri Lankan military personnel are routinely deployed in *Leishmania*-endemic countries as part of  
366 UN peace keeping missions and returning soldiers are a known risk factor for importing parasitic  
367 diseases<sup>47</sup>. Indeed, chemoprophylaxis and screening against Malaria upon returning from a mission  
368 is routine as part of Sri Lanka personnel deployments in countries such as Sudan<sup>47</sup>. As argued

369 within this and other studies<sup>24–26</sup>, the genetic evidence argues there have been multiple sources of  
370 *L. donovani* entry into Sri Lanka, yet there is no visceral disease and atypical cutaneous  
371 leishmaniasis has successfully propagated<sup>20</sup>. Future studies must address why atypical *L. donovani*  
372 parasites would be imported and propagated in Sri Lanka instead of visceral disease-causing *L.*  
373 *donovani* which are vastly more common in neighboring India and Africa.

## 374 **Methods**

### 375 **Data collection**

376 All sequencing information used in our analysis was obtained from publicly available records on  
377 the Sequencing Reads Archive (SRA) repository provided by NCBI<sup>27</sup>. A search was performed to  
378 obtain all sequencing records for the *Leishmania donovani* organism (NCBI Taxonomy ID 5661).  
379 The read sets were filtered to remove any data originating from unknown or transcriptomic cDNA  
380 source. The remainder of gDNA reads sets were filtered to remove targeted capture experiments  
381 and retained only whole genome random selection libraries. As long reads are error prone and  
382 more suitable for assembly than SNP calling, non-Illumina long read sets were removed. To  
383 increase the accuracy of the SNP calls, only reads in paired mode were retained. Any SRA  
384 belonging to the BioProject PRJEB8793 were removed as they originate from single cell data and  
385 therefore did not contain enough coverage. Other samples with low coverage were removed  
386 manually after inspection of the alignments, the retained read sets used for phylogenetic analysis  
387 are listed in Supplementary Table S1. Samples with the ‘LK’ WHO country code (Sri Lanka) in  
388 their isolate name were grouped with our previous Sri Lankan data.

389 Sequences from NCBI BioProject PRJNA413320 were from 6 cutaneous leishmaniasis case  
390 isolates (SRR6257369, SRR6257364, SRR6257365, SRR6257368, SRR6257370, SRR6257371)

391 and 2 isolates from visceral leishmaniasis patients with Leukemia and Diabetes Mellitus co-  
392 morbidities (SRR6257366 & SRR6257367)<sup>26</sup>. As there have been fewer than 7 visceral  
393 leishmaniasis cases since 2004 in Sri Lanka and the majority of these having co-morbidities<sup>21</sup>, we  
394 have made the assumption that the SRR6257366 and SRR6257367 isolates do not cause active  
395 transmission of visceral leishmaniasis but likely have contributed to the 15000 reported cases of  
396 cutaneous leishmaniasis in Sri Lanka since 2001<sup>19,20</sup>.

### 397 **Alignment of all sequenced *L. donovani* isolates to the reference genome**

398 The filtered 684 sequencing samples were distributed evenly across three Compute Canada  
399 clusters, Beluga at Calcul Quebec, Niagara at SciNet, and Cedar at WestGrid. The raw reads for  
400 each sample were downloaded using the SRA-Toolkit provided by NCBI<sup>27</sup> using the ‘fastq-dump  
401 –split-files’ command. The alignment of all reads obtained from the SRA was performed as  
402 previously described<sup>24</sup>. Briefly, Illumina paired reads were aligned to the reference Sri Lanka  
403 genome<sup>24</sup> using the Burrows-Wheeler Aligner<sup>48</sup>, file formats transformed using samtools<sup>49</sup>, and  
404 variant calling was done with VarScan2<sup>32</sup> to generate VCF files with an alternate allele frequency  
405 cut-off of 20%. This pipeline was automated using in house scripts to process the data in parallel  
406 across 684 nodes on the clusters resulting in one VCF file per sample containing a list of all  
407 polymorphisms and their respective frequencies.

### 408 ***L. donovani* global strains phylogeny**

409 The resulting 684 VCF files generated at the alignment stage described above were merged using  
410 BCFtools<sup>49</sup> with the command ‘bcftools merge –missing-to-ref ’ resulting in a single VCF file  
411 containing all the possible genetic polymorphisms identified in all 684 samples. The merged VCF  
412 file was imported into TASSEL version 5.0<sup>50</sup> and subjected to a relatedness analysis to generate a

413 distance matrix and a phylogenetic tree using the Neighbor-Joining algorithm. The phylogenetic  
414 tree was exported in Newick format and visualized using the Interactive Tree of Life (IToL)<sup>51</sup> to  
415 assign colors to nodes and clades.

416 After identification of likely inter-species hybridization, additional samples from *L. major* and *L.*  
417 *tropica* whole genome sequencing experiments were aligned to the *L. donovani* LdCL genome to  
418 generate a list of polymorphisms between the species and these were added to the global *L.*  
419 *donovani* polymorphism VCF file and processed as above to generate a phylogenetic tree to place  
420 the putative hybrid strains.

#### 421 **Heterozygosity of *L. donovani* isolates worldwide**

422 Variant loci from the VarScan2 annotated VCF files were assigned a HET or HOM value based  
423 on the variant allele read frequency for each site for each sample if the software determined the  
424 SNP to be heterozygous or homozygous respectively. The frequency of HET and HOM variant  
425 annotations across the entire genome was calculated on a per sample basis resulting in a single  
426 data point per sample with the Heterozygous ratio defined as (Het/Het+Hom). As the SL1 isolates  
427 fall within the reference cluster, resulting in homozygous polymorphisms being masked by the  
428 reference which artificially shifts the Heterozygous ratio, these isolates were aligned to the  
429 Nepalese reference genome for the purpose of this calculation. The Sri Lankan isolates from  
430 BioProject PRJNA413320 (belonging to the SL2 and SL3 groups), our previous studies<sup>24,25</sup>, and  
431 one sample from PRJEB2600 (belonging to the SL1 group) were grouped together. 10 samples  
432 previously characterized as intra-species hybrids of *L. donovani* between the North and South  
433 clusters of Ethiopian *L. donovani*<sup>7</sup> were grouped together as a hybrid sample positive control  
434 group. The remaining 662 samples were grouped together to represent the natural *L. donovani*  
435 distribution.

## 436 **Identification of species in the hybrid parasites**

437 The genomic annotation from the LdCL strain previously generated<sup>24</sup> were used to generate a  
438 region list of the genomic coordinates of every gene in the ‘chr:start-stop’ format. This region list  
439 was used as an input to samtools with the ‘faidx’ command to extract the genomic sequence  
440 corresponding to each gene locus from the LdCL reference genome file.

441 For each sample independently, the VCF file containing the location and nucleotide change of  
442 every polymorphism along the genome for that sample was used as an input file for BCFtools<sup>52</sup>  
443 with the command ‘consensus’ to transform the genomic sequences from the reference generated  
444 in the previous step into their alternate or reconstructed sequences to reflect the genotype of each  
445 sample for 9,757 gene loci.

446 The complete genomes of all *Leishmania* species reference strains were downloaded from  
447 TriTrypDB v46<sup>33</sup> (*L. major* Friedlin, *L. donovani* BPK282, *L. tropica* L590, *L. tarentolae* Parrot-  
448 TarII, *L. turanica* LEM423, *L. gerbilli* LEM452, *L. enriettii* LEM3045, *L. arabica* LEM1108 & *L.*  
449 *aethiopica* L147) in FASTA format. The genomes were concatenated into a single FASTA file  
450 and used as an input for NCBI BLAST+ v2.7.1 using the ‘command makeblastdb’ and ‘-dbtype  
451 nucl’ option to create a database of Old World *Leishmania* genomic sequences. For the refined  
452 search, all additional non-reference strains genetic sequences were later added (*L. donovani* LV9,  
453 *L. donovani* LdCL, *L. donovani* BHU1220, *L. major* SD75, *L. major* LV39).

454 The alternate or reconstructed sequences for each sample were then used as a list of input queries  
455 for this database using the command ‘blastn’ with the options ‘-max\_target\_seqs 1 -max\_hsps 1 -  
456 outfmt “6 qseqid qcovs pident stitle”’ to create a report of 9,757 species or strain matches for each  
457 queried sample. These reports were then tabulated to generate radar plots depicting the probable

458 genetic contributions of each species/strain per sample and the genomic coordinates used to  
459 generate chromosomal maps of parental blocks using *circos*<sup>53</sup> to paint the regions on a circular  
460 karyotype representation of the *L. donovani* genome .

#### 461 **Haplotype phasing**

462 Read-based phasing was applied to separate the two putative haplotypes present in samples with  
463 high heterozygosity. For each sample, the BAM alignment file generated by the burrows wheeler  
464 aligner<sup>48</sup> was additionally processed prior to polymorphism analysis by VarScan v2<sup>32</sup> as described  
465 above. The alignment was processed using the ‘phase’ command from samtools<sup>49</sup> with the option  
466 ‘-A’ to drop reads with an ambiguous phase resulting in two separate alignment files with  
467 segregated reads based on haplotype blocks. The two alignments files containing roughly half of  
468 the original reads each were manually inspected for concordance along the coordinates output by  
469 the tools as being continuous phase blocks by manual inspection. Alternate gene reconstruction  
470 was performed on each phase of each sample independently using BCFtools<sup>52</sup> as described above  
471 and aligned with orthologous reference *Leishmania* sequences using Clustal Omega<sup>54</sup> to generate  
472 a phylogenetic tree of the phased samples.

#### 473 **Role of the funding source**

474 This research was support by grant from the Canadian Institutes of Health Research (CIHR) to  
475 GM and a doctoral training award from the Fond de Recherche du Quebec en Santé (FRQS) to PL.  
476 The funding agencies had no role in the design, collection, analysis, or decision to publish this  
477 study.

#### 478 **Declaration of interests**

479 The authors declare no financial or personal competing interest.

480 **Contributions**

481 PL designed the study, collected and analysed the data and wrote the manuscript. GM helped  
482 design the study, wrote and edited the manuscript. Both authors have read and approved the final  
483 version of the manuscript.

484

485 **Acknowledgements**

486 We thank Wen Wei Zhang, Kayla Paulini, and Jesse Shapiro for their insightful feedback and  
487 suggestions. All DNA sample collection and sequencing were performed by their respective  
488 research groups, for complete attribution refer to the corresponding SRA accession page.

489 This research was enabled in part by support provided by Calcul Quebec (Beluga cluster,  
490 <https://www.calculquebec.ca/en/>), SciNet (Niagara cluster, <https://www.scinethpc.ca/niagara/>),  
491 WestGrid (Cedar Cluster, <https://www.westgrid.ca/>) and Compute Canada  
492 ([www.computecanada.ca](http://www.computecanada.ca)).

493

494 **Data availability**

495 **Accession Numbers**

496 All data used in this study were obtained from publicly available sources, all accession numbers  
497 used are listed in Supplementary Table S1.

498 **Data files**

499 The phylogenetic tree generated in this study is available in an interactive format provided by iTOL  
500 at: <https://itol.embl.de/tree/1322162673368791580134755>

501 **Code availability**

502 All software and methodologies used are described within Methods.

503 **References**

- 504 1 WHO. Leishmaniasis. <https://www.who.int/leishmaniasis/burden/en/>.
- 505 2 Burza S, Croft SL, Boelaert M. Leishmaniasis. *Lancet* 2018; **392**: 951–70.
- 506 3 Rijal S, Sundar S, Mondal D, Das P, Alvar J, Boelaert M. Eliminating visceral leishmaniasis in  
507 South Asia: The road ahead. *BMJ*. 2019. DOI:10.1136/bmj.k5224.
- 508 4 Scorza BM, Carvalho EM, Wilson ME. Cutaneous manifestations of human and murine  
509 leishmaniasis. *Int. J. Mol. Sci.* 2017. DOI:10.3390/ijms18061296.
- 510 5 Rogers MB, Downing T, Smith BA, *et al.* Genomic Confirmation of Hybridisation and Recent  
511 Inbreeding in a Vector-Isolated Leishmania Population. *PLoS Genet* 2014.  
512 DOI:10.1371/journal.pgen.1004092.
- 513 6 Zackay A, Nasereddin A, Takele Y, *et al.* Polymorphism in the HASPB Repeat Region of East  
514 African Leishmania donovani Strains. *PLoS Negl Trop Dis* 2013.  
515 DOI:10.1371/journal.pntd.0002031.
- 516 7 Gelanew T, Kuhls K, Hurissa Z, *et al.* Inference of population structure of leishmania donovani  
517 strains isolated from different ethiopian visceral leishmaniasis endemic areas. *PLoS Negl Trop Dis*  
518 2010. DOI:10.1371/journal.pntd.0000889.
- 519 8 Gelanew T, Hailu A, Scho'nian G, Lewis MD, Miles MA, Yeo M. Multilocus sequence and  
520 microsatellite identification of intra-specific hybrids and ancestor-like donors among natural  
521 ethiopian isolates of leishmania donovani. *Int J Parasitol* 2014. DOI:10.1016/j.ijpara.2014.05.008.
- 522 9 Zackay A, Cotton JA, Sanders M, *et al.* Genome wide comparison of Ethiopian Leishmania



- 523 donovani strains reveals differences potentially related to parasite survival. *PLoS Genet* 2018.  
524 DOI:10.1371/journal.pgen.1007133.
- 525 10 Chargui N, Amro A, Haouas N, *et al.* Population structure of Tunisian *Leishmania infantum* and  
526 evidence for the existence of hybrids and gene flow between genetically different populations. *Int*  
527 *J Parasitol* 2009. DOI:10.1016/j.ijpara.2008.11.016.
- 528 11 Ravel C, Cortes S, Pratlong F, Morio F, Dedet JP, Campino L. First report of genetic hybrids  
529 between two very divergent *Leishmania* species: *Leishmania infantum* and *Leishmania major*. *Int*  
530 *J Parasitol* 2006. DOI:10.1016/j.ijpara.2006.06.019.
- 531 12 Odiwuor S, De Doncker S, Maes I, Dujardin JC, Van der Auwera G. Natural *Leishmania*  
532 *donovani/Leishmania aethiopica* hybrids identified from Ethiopia. *Infect Genet Evol* 2011.  
533 DOI:10.1016/j.meegid.2011.04.026.
- 534 13 Ozbilgin A, Culha G, Zeyrek FY, *et al.* Cutaneous and visceral tropisms of *Leishmania*  
535 *tropica/Leishmania infantum* hybrids in a murine model: First report of hybrid *Leishmania* strains  
536 isolated in Turkey. *Int J Infect Dis* 2012. DOI:10.1016/j.ijid.2012.05.702.
- 537 14 Akopyants NS, Kimblin N, Secundino N, *et al.* Demonstration of genetic exchange during cyclical  
538 development of *Leishmania* in the sand fly vector. *Science (80- )* 2009.  
539 DOI:10.1126/science.1169464.
- 540 15 Sadlova J, Yeo M, Seblova V, *et al.* Visualisation of *leishmania donovani* fluorescent hybrids  
541 during early stage development in the sand fly vector. *PLoS One* 2011.  
542 DOI:10.1371/journal.pone.0019851.
- 543 16 Inbar E, Akopyants NS, Charmoy M, *et al.* The Mating Competence of Geographically Diverse  
544 *Leishmania major* Strains in Their Natural and Unnatural Sand Fly Vectors. *PLoS Genet* 2013.  
545 DOI:10.1371/journal.pgen.1003672.

- 546 17 Romano A, Inbar E, Debrabant A, *et al.* Cross-species genetic exchange between visceral and  
547 cutaneous strains of *Leishmania* in the sand fly vector. *Proc Natl Acad Sci U S A* 2014.  
548 DOI:10.1073/pnas.1415109111.
- 549 18 Inbar E, Shaik J, Iantorno SA, *et al.* Whole genome sequencing of experimental hybrids supports  
550 meiosis-like sexual recombination in leishmania. *PLoS Genet* 2019.  
551 DOI:10.1371/journal.pgen.1008042.
- 552 19 WHO. Status of endemicity of cutaneous leishmaniasis, worldwide, 2018. Geneva, 2018  
553 [https://www.who.int/leishmaniasis/burden/GHO\\_CL\\_2018.pdf?ua=1](https://www.who.int/leishmaniasis/burden/GHO_CL_2018.pdf?ua=1).
- 554 20 Karunaweera ND, Ginige S, Senanayake S, *et al.* Spatial Epidemiologic Trends and Hotspots of  
555 Leishmaniasis, Sri Lanka, 2001-2018. *Emerg Infect Dis* 2020; **26**: 1–10.
- 556 21 Siriwardana HVYD, Karunanayake P, Goonerathne L, Karunaweera ND. Emergence of visceral  
557 leishmaniasis in Sri Lanka: a newly established health threat. *Pathog Glob Health* 2017.  
558 DOI:10.1080/20477724.2017.1361564.
- 559 22 WHO. Status of endemicity of visceral leishmaniasis, worldwide, 2018. Geneva, 2018  
560 [https://www.who.int/leishmaniasis/burden/GHO\\_VL\\_2018.pdf?ua=1](https://www.who.int/leishmaniasis/burden/GHO_VL_2018.pdf?ua=1).
- 561 23 Thakur L, Singh KK, Shanker V, *et al.* Atypical leishmaniasis: A global perspective with  
562 emphasis on the Indian subcontinent. *PLoS Negl. Trop. Dis.* 2018.  
563 DOI:10.1371/journal.pntd.0006659.
- 564 24 Lypaczewski P, Hoshizaki J, Zhang W-W, *et al.* A complete *Leishmania donovani* reference  
565 genome identifies novel genetic variations associated with virulence. *Sci Rep* 2018; **8**.  
566 DOI:10.1038/s41598-018-34812-x.
- 567 25 Zhang WW, Ramasamy G, McCall LI, *et al.* Genetic Analysis of *Leishmania donovani* Tropism  
568 Using a Naturally Attenuated Cutaneous Strain. *PLoS Pathog* 2014; **10**: e1004244.

- 569 26 Samarasinghe SR, Samaranayake N, Kariyawasam UL, Siriwardana YD, Imamura H,  
570 Karunaweera ND. Genomic insights into virulence mechanisms of *Leishmania donovani*:  
571 Evidence from an atypical strain. *BMC Genomics* 2018. DOI:10.1186/s12864-018-5271-z.
- 572 27 Leinonen R, Sugawara H, Shumway M. The sequence read archive. *Nucleic Acids Res* 2011.  
573 DOI:10.1093/nar/gkq1019.
- 574 28 Franssen SU, Durrant C, Stark O, *et al.* Global genome diversity of the *Leishmania donovani*  
575 complex. *Elife* 2020. DOI:10.7554/eLife.51243.
- 576 29 Imamura H, Downing T, van den Broeck F, *et al.* Evolutionary genomics of epidemic visceral  
577 leishmaniasis in the Indian subcontinent. *Elife* 2016. DOI:10.7554/eLife.12613.
- 578 30 Cuypers B, Berg M, Imamura H, *et al.* Integrated genomic and metabolomic profiling of ISC1, an  
579 emerging *Leishmania donovani* population in the Indian subcontinent. *Infect Genet Evol* 2018.  
580 DOI:10.1016/j.meegid.2018.04.021.
- 581 31 Cotton JA, Durrant C, Franssen SU, *et al.* Genomic analysis of natural intra-specific hybrids  
582 among Ethiopian isolates of *Leishmania donovani*. *PLoS Negl Trop Dis* 2020.  
583 DOI:10.1371/journal.pntd.0007143.
- 584 32 Koboldt DC, Zhang Q, Larson DE, *et al.* VarScan 2: Somatic mutation and copy number alteration  
585 discovery in cancer by exome sequencing. *Genome Res* 2012; **22**: 568–76.
- 586 33 Aslett M, Aurrecochea C, Berriman M, Al. E. TriTrypDB: a functional genomic resource for the  
587 Trypanosomatidae. *Nucleic Acids Res* 2010; **38**: D457-62.
- 588 34 Camacho E, González-de la Fuente S, Rastrojo A, *et al.* Complete assembly of the *Leishmania*  
589 *donovani* (HU3 strain) genome and transcriptome annotation. *Sci Rep* 2019. DOI:10.1038/s41598-  
590 019-42511-4.
- 591 35 Sterkers Y, Crobu L, Lachaud L, Pagès M, Bastien P. Parasexuality and mosaic aneuploidy in

- 592 Leishmania: Alternative genetics. *Trends Parasitol.* 2014. DOI:10.1016/j.pt.2014.07.002.
- 593 36 Barja PP, Pescher P, Bussotti G, *et al.* Haplotype selection as an adaptive mechanism in the  
594 protozoan pathogen *Leishmania donovani*. *Nat Ecol Evol* 2017. DOI:10.1038/s41559-017-0361-x.
- 595 37 Senanayake SASC, Abeyewicreme W, Dotson EM, Karunaweera ND. Characteristics of  
596 phlebotomine sandflies in selected areas of Sri Lanka. *Southeast Asian J Trop Med Public Health*  
597 2015.
- 598 38 Volf P, Benkova I, Myskova J, Sadlova J, Campino L, Ravel C. Increased transmission potential  
599 of *Leishmania major/Leishmania infantum* hybrids. *Int J Parasitol* 2007.  
600 DOI:10.1016/j.ijpara.2007.02.002.
- 601 39 Lypaczewski P, Zhang W-W, Matlashewski G. A single amino acid mutation in the RagC protein  
602 of *Leishmania donovani* alters pathogenesis and tropism (In preparation). 2020.
- 603 40 Siriwardana Y, Deepachandi B, Weliange SDS, *et al.* First Evidence for Two Independent and  
604 Different Leishmaniasis Transmission Foci in Sri Lanka: Recent Introduction or Long-Term  
605 Existence? *J Trop Med* 2019. DOI:10.1155/2019/6475939.
- 606 41 Siriwardana Y, Zhou G, Deepachandi B, *et al.* Trends in Recently Emerged *Leishmania donovani*  
607 Induced Cutaneous Leishmaniasis, Sri Lanka, for the First 13 Years. *Biomed Res Int* 2019.  
608 DOI:10.1155/2019/4093603.
- 609 42 Mahmoudzadeh-Niknam H, Kiaei SS, Irvani D. *Leishmania tropica* infection, in comparison to  
610 *Leishmania major*, induces lower delayed type hypersensitivity in BALB/c mice. *Korean J*  
611 *Parasitol* 2007. DOI:10.3347/kjp.2007.45.2.103.
- 612 43 Croft SL, Sundar S, Fairlamb AH. Drug resistance in leishmaniasis. *Clin. Microbiol. Rev.* 2006.  
613 DOI:10.1128/CMR.19.1.111-126.2006.
- 614 44 Iantorno SA, Durrant C, Khan A, *et al.* Gene expression in *Leishmania* is regulated predominantly

- 615 by gene dosage. *MBio* 2017. DOI:10.1128/mBio.01393-17.
- 616 45 Kassahun A, Sadlova J, Benda P, *et al.* Natural infection of bats with *Leishmania* in Ethiopia. *Acta*  
617 *Trop* 2015. DOI:10.1016/j.actatropica.2015.07.024.
- 618 46 Kassahun A, Sadlova J, Dvorak V, *et al.* Detection of *leishmania donovani* and *L. tropica* in  
619 ethiopian wild rodents. *Acta Trop* 2015. DOI:10.1016/j.actatropica.2015.02.006.
- 620 47 Fernando SD, Dharmawardana P, Semege S, *et al.* The risk of imported malaria in security forces  
621 personnel returning from overseas missions in the context of prevention of re-introduction of  
622 malaria to Sri Lanka. *Malar J* 2016. DOI:10.1186/s12936-016-1204-y.
- 623 48 Li H. Aligning sequence reads, clone sequences and assembly contigs with BWA-MEM. 2013;  
624 **arXiv:1303**.
- 625 49 Li H, Handsaker B, Wysoker A, *et al.* The Sequence Alignment/Map format and SAMtools.  
626 *Bioinformatics* 2009; **25**: 2078–9.
- 627 50 Bradbury PJ, Zhang Z, Kroon DE, Casstevens TM, Ramdoss Y, Buckler ES. TASSEL: Software  
628 for association mapping of complex traits in diverse samples. *Bioinformatics* 2007.  
629 DOI:10.1093/bioinformatics/btm308.
- 630 51 Letunic I, Bork P. Interactive Tree Of Life (iTOL) v4: recent updates and new developments.  
631 *Nucleic Acids Res* 2019. DOI:10.1093/nar/gkz239.
- 632 52 Danecek P, McCarthy SA. BCFtools/csq: Haplotype-aware variant consequences. *Bioinformatics*  
633 2017. DOI:10.1093/bioinformatics/btx100.
- 634 53 Krzywinski M, Schein J, Birol I, *et al.* Circos: An information aesthetic for comparative genomics.  
635 *Genome Res* 2009. DOI:10.1101/gr.092759.109.
- 636 54 EMBL-EBI H. Clustal Omega : Multiple Sequence Alignment. *Eur Mol Biol Lab* 2017.

637 **Figures**

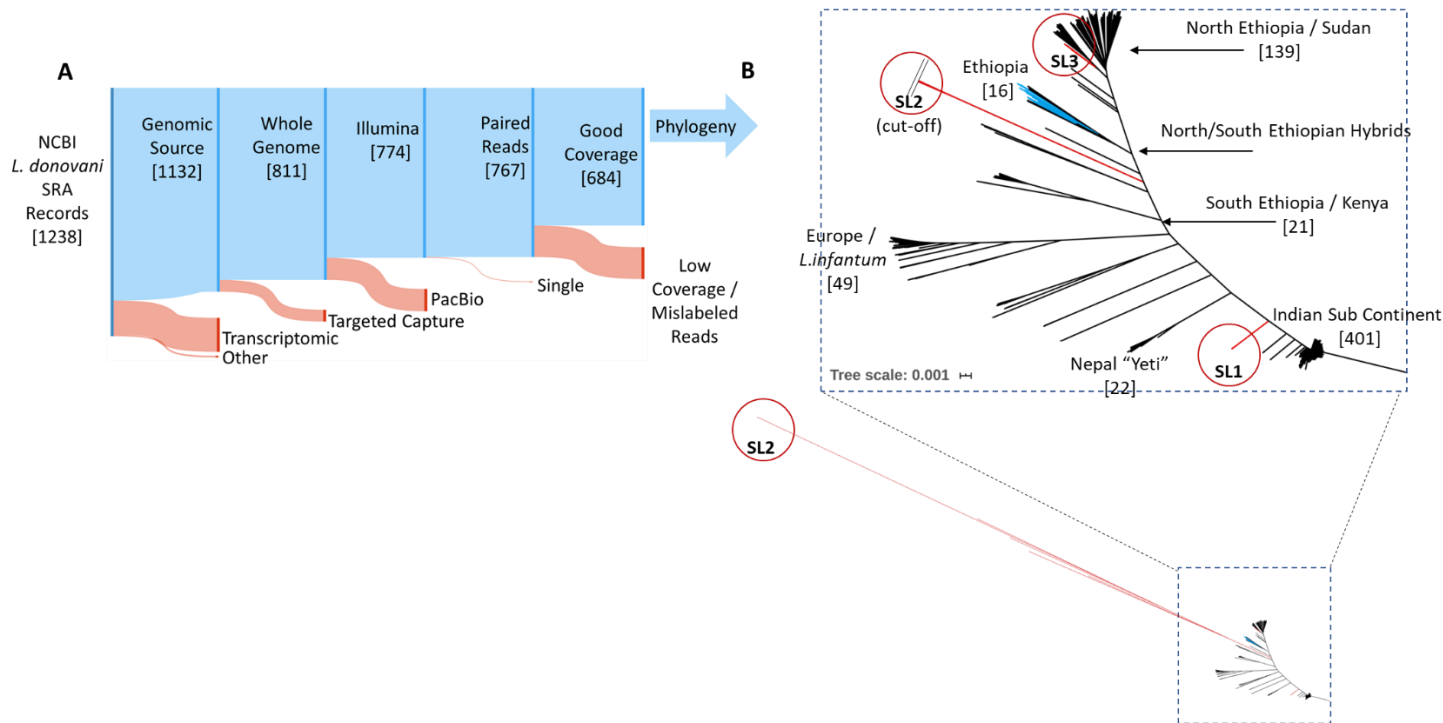

638

639 **Figure 1. Worldwide *L. donovani* phylogenetic tree.** **A.** Selection filters applied to the NCBI  
640 1242 public *L. donovani* Sequence Read Archive (SRA) records to obtain good quality *L. donovani*  
641 sequencing data for phylogenetic analysis. Sequencing records were retained if they originated  
642 from genomic DNA, had no selection bias for genomic location, were sequenced on high accuracy  
643 Illumina platforms in paired sequencing mode and had coverage spanning the entire genome. **B.**  
644 Neighbor Joining based tree of all *L. donovani* samples analyzed showing clear geographical  
645 groupings. 401 Indian Sub Continent samples cluster close to each other and next to the previously  
646 sequenced Sri Lankan isolates<sup>26</sup> labeled **SL1** (Sri Lanka Group 1) and the Nepalese highland  
647 “Yeti” strains. Ethiopian isolates form three separate clusters based on genotype, North, South and  
648 hybrid (blue). Five highly divergent Sri Lankan Sri Lanka Group 2 isolates (**SL2**) cluster at a long

649 distance from all other *L. donovani* isolates. Three Sri Lanka Group 3 (**SL3**) isolates cluster on the  
650 edge of the North Ethiopian cluster.

651

652

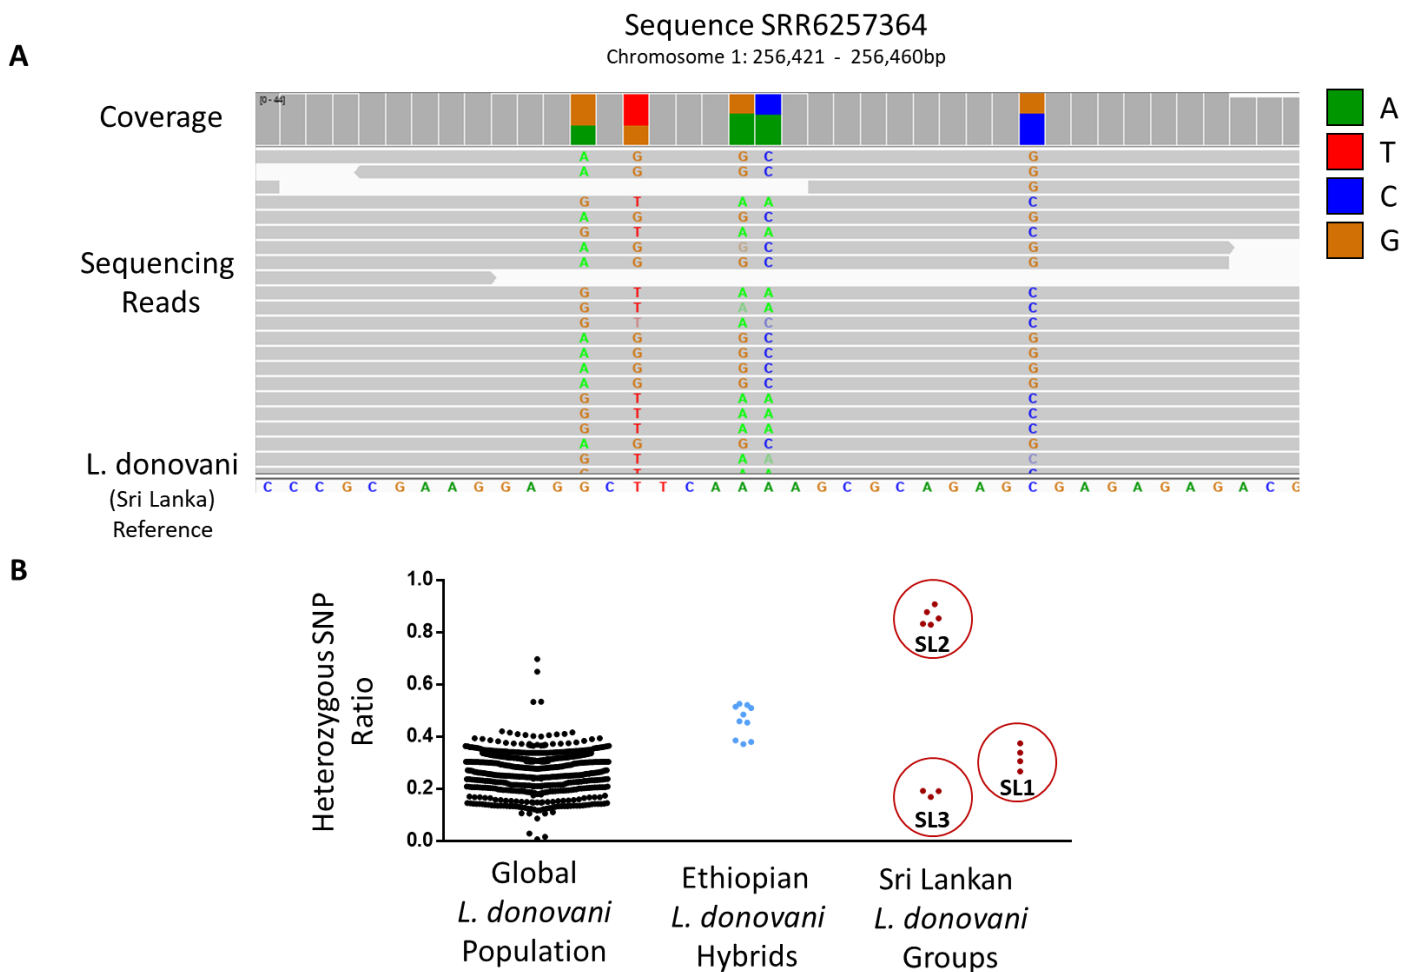

653

654 **Figure 2. Distribution of heterozygous polymorphisms across all samples.** **A.** Representative

655 alignment of SL2 group samples on a 40bp region of *L. donovani* chromosome 1 showing frequent

656 heterozygosity. Reads matching the reference sequence<sup>24</sup> (bottom) with no SNPs are displayed in

657 gray. Loci where reads contain variability are highlighted in colors corresponding to the respective

658 nucleotides. **B.** Comparison of the heterozygous SNP frequency in all *L. donovani* world wide

659 isolates, known Ethiopian hybrid parasites<sup>7,8</sup> to the Sri Lankan isolates. The heterozygosity ratios

660 were calculated as the portion of the heterozygous SNPs and indels across the entire genome in a

661 sample (het/het+hom). Each dot represents a single SRA record. Isolates from Ethiopia previously



662 identified as hybrid parasites<sup>7,8</sup> and their respective frequency shown in blue. Sri Lankan isolates  
663 from the SL1, SL2 and SL3 groups are shown in red and their group assignment is highlighted.

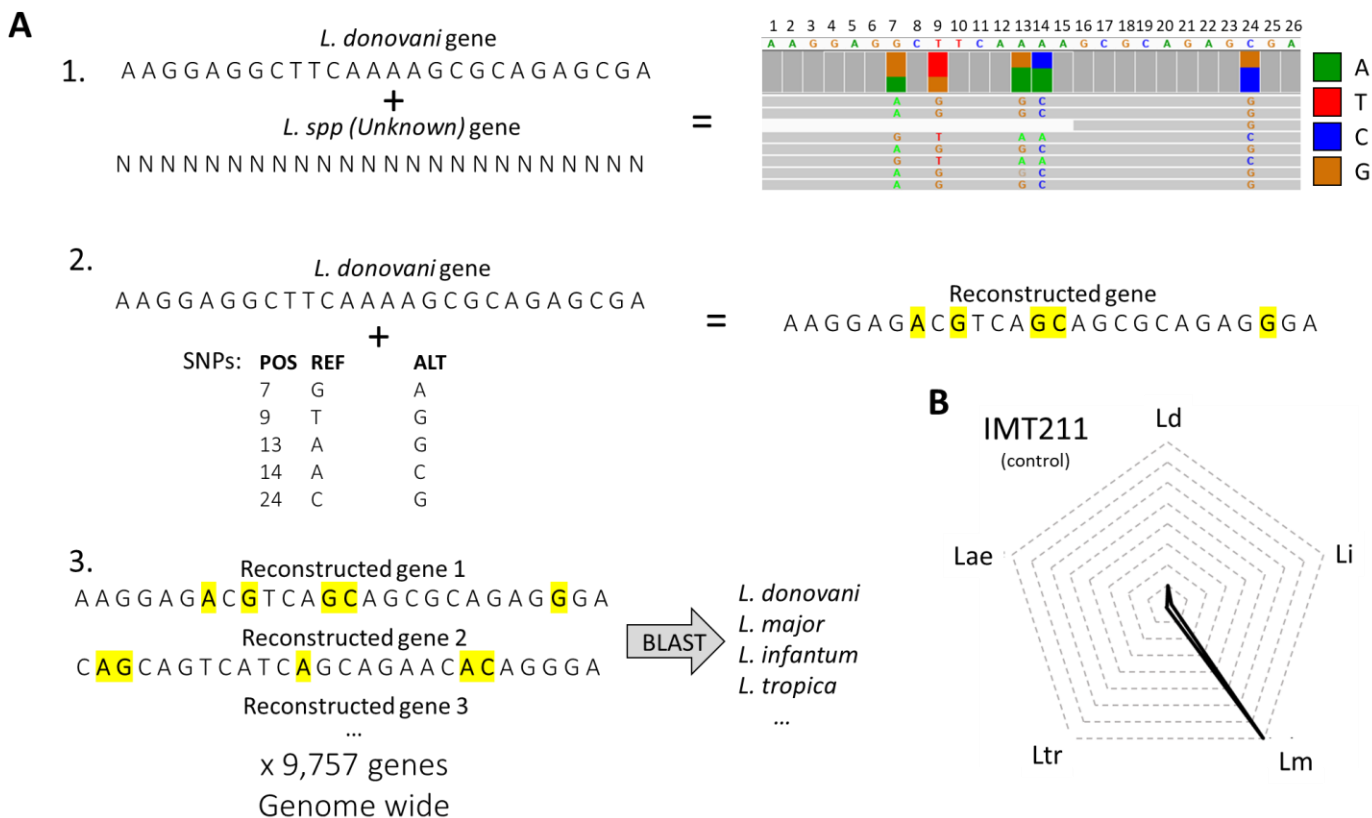

664

665 **Figure 3. Methodology used to determine the parental strain lineage. A.** Hybrid SNP loci were  
666 assumed to have received one allele from *L. donovani* and one allele from an unknown parent  
667 resulting in alignments with polymorphisms occurring at +/-50%. Gene sequences from the Sri  
668 Lanka reference *L. donovani*<sup>24</sup> (REF) were transformed at the position (POS) of each SNP (ALT)  
669 across the entire genome to reconstruct the gene sequences of the unknown parent *Leishmania*  
670 species. All reconstructed gene sequences were then compared to a *Leishmania* database  
671 containing all Old World *Leishmania* reference genomes by BLAST searches and assigned an  
672 originating species and strain. **B.** Control analysis using a known hybrid (IMT211) with *L. major*  
673 and *L. infantum*<sup>11</sup> showing reconstructed genes mostly matching *L. major*. Each level in the radar  
674 plot corresponds to 1,000 gene matches in the corresponding species (dotted lines).

675

**A**

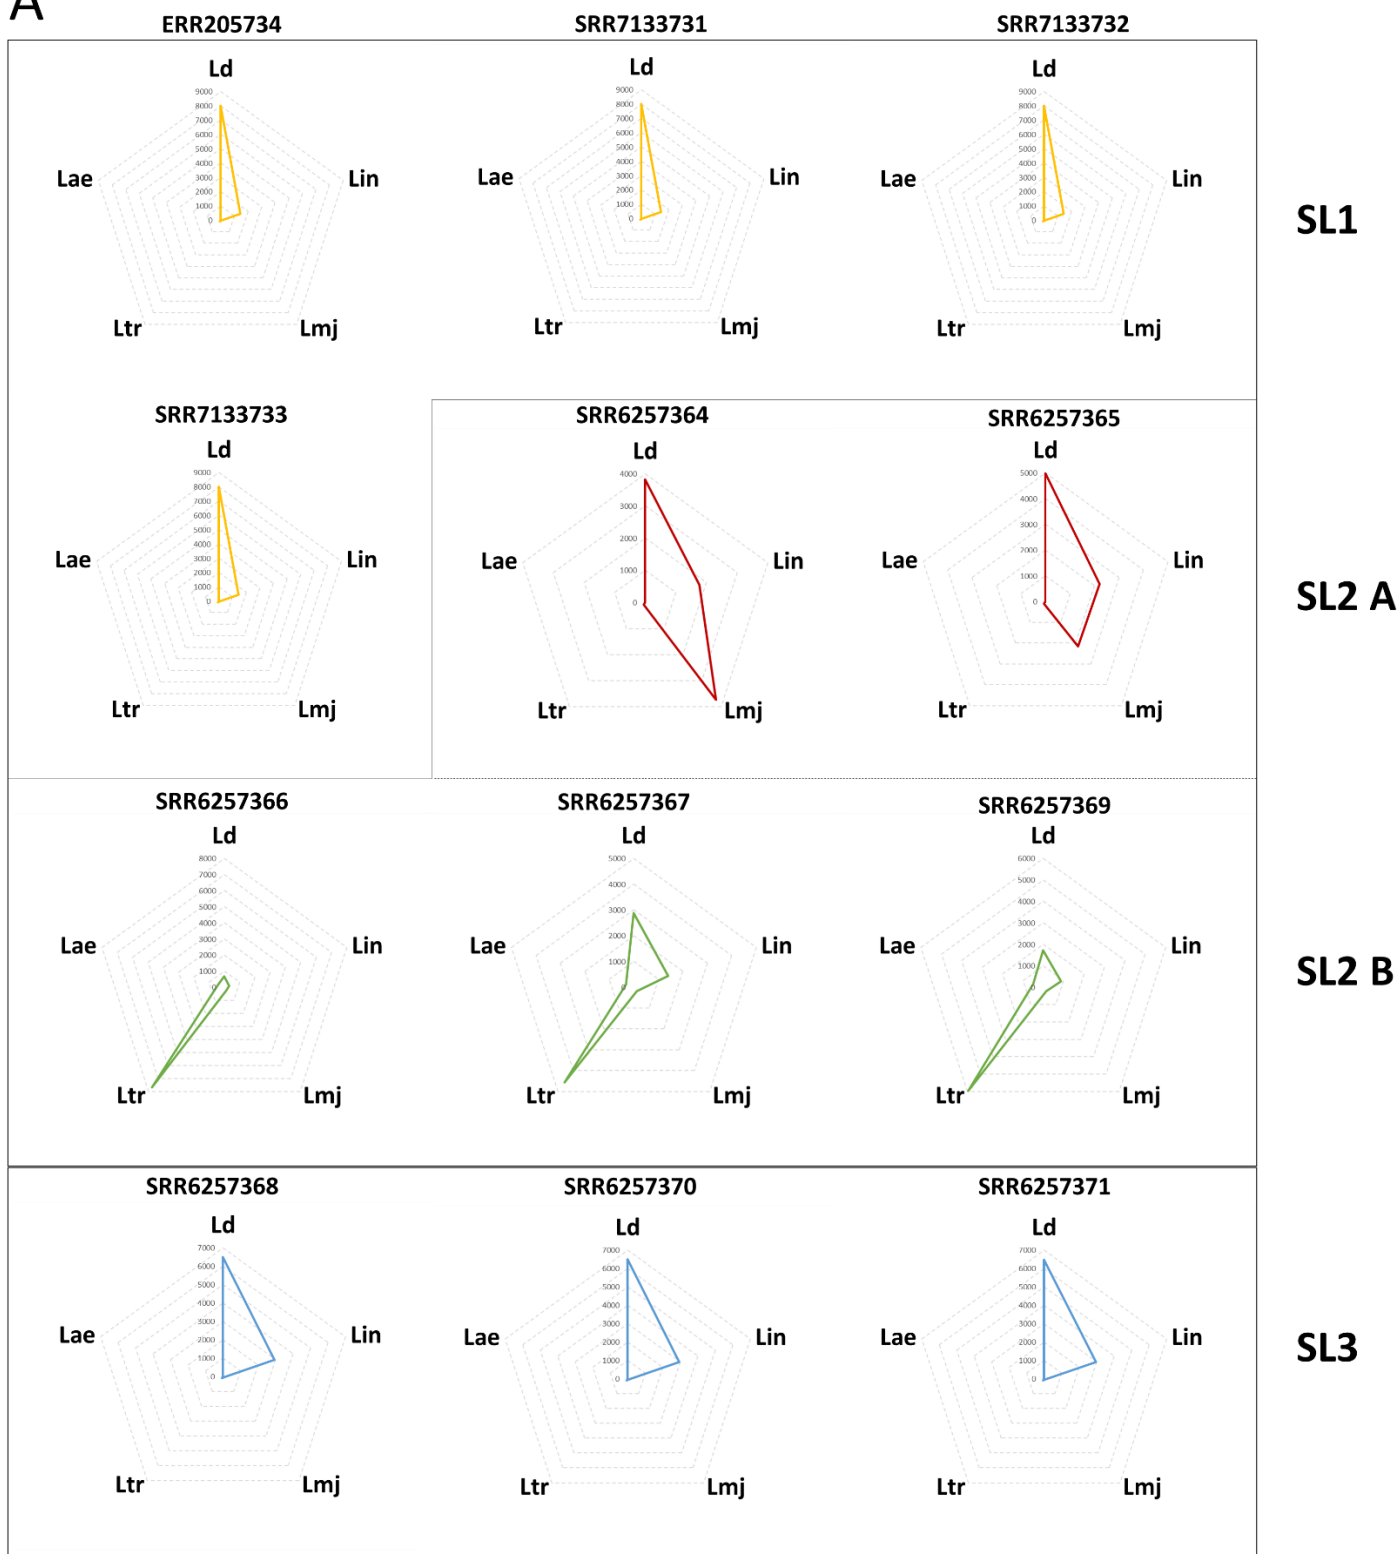

676

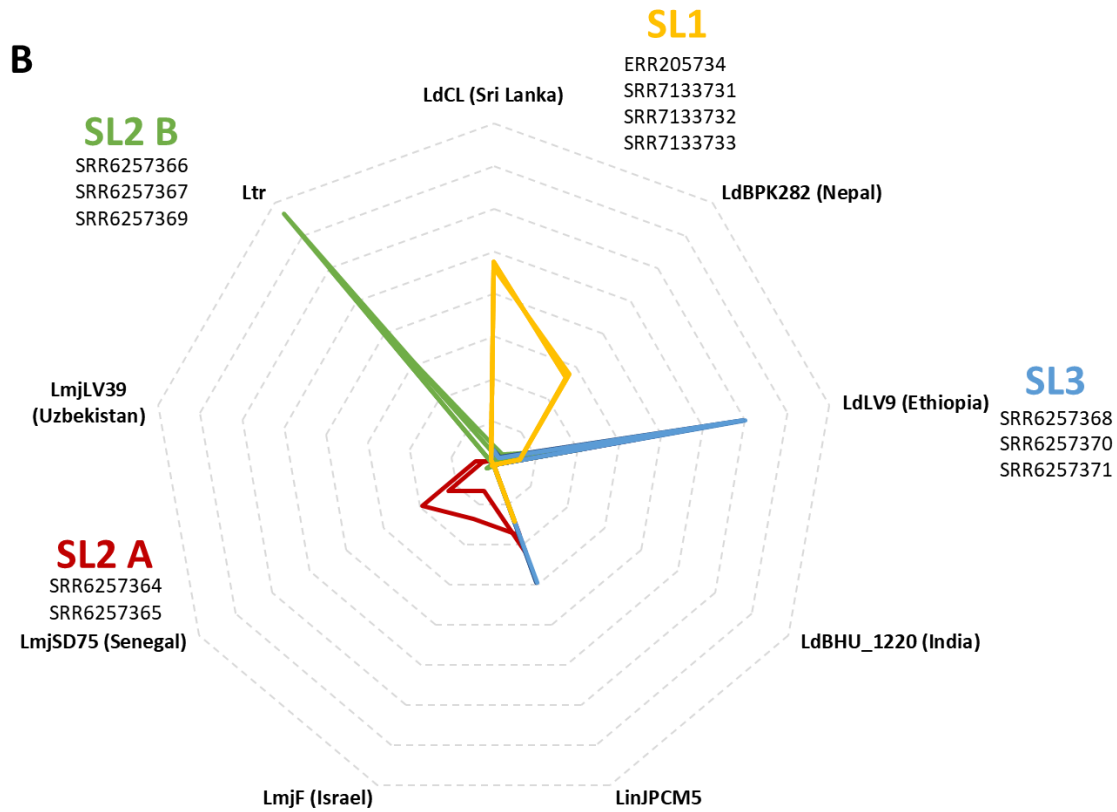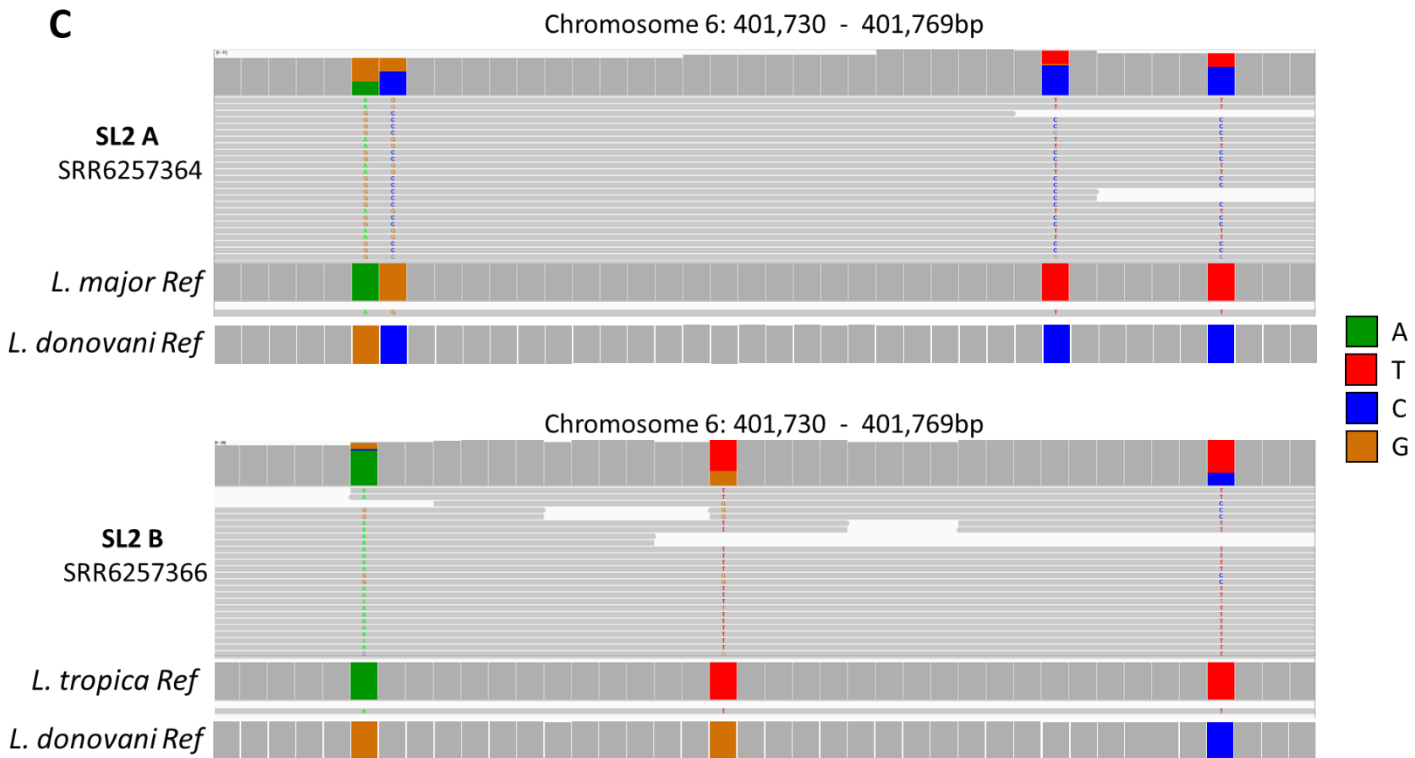

677

678 **Figure 4. Evidence of hybrid genotypes with *L. major* and *L. tropica*.** **A.** Distribution of species  
679 origin of reconstructed genes as determined by BLAST analysis. Reconstructed genes from all  
680 SL1 isolates match nearly exclusively the *L. donovani* species complex. Two SL2 isolates match  
681 predominantly to *L. donovani* complex species but retained genes from *L. major* (SL2 A, top).  
682 Three SL2 isolates match with *L. tropica* more than with the *L. donovani* complex (SL2 B, middle).  
683 Three isolates match the *L. donovani* complex with almost no match outside *L. donovani* (SL3,  
684 bottom). **B.** Distribution of the origin of reconstructed genes to different reference strain genomes  
685 as determined by BLAST analysis. Each level in the radar plots corresponds to 1,000 gene matches  
686 in the corresponding species (dotted lines). All SL1 isolates show a greater match to Sri Lankan  
687 and Nepalese reference genomes (Orange). The two SL2 A subgroup isolates show a greater match  
688 with the *L. major* strain SD75 from Senegal than with the Friedlin strain from Israel or LV39 strain  
689 from Uzbekistan (red). The three SL2 B subgroup isolates show a single match with *L. tropica*  
690 (green). The three SL3 group isolates show a preferential match to the African LV9 strain of *L.*  
691 *donovani* (blue). **C.** Representative alignment of a *L. major* and *L. tropica* hybrid on the same  
692 section of chromosome 6 showing heterozygous polymorphism matching *L. major* and *L. tropica*  
693 respectively.  
694

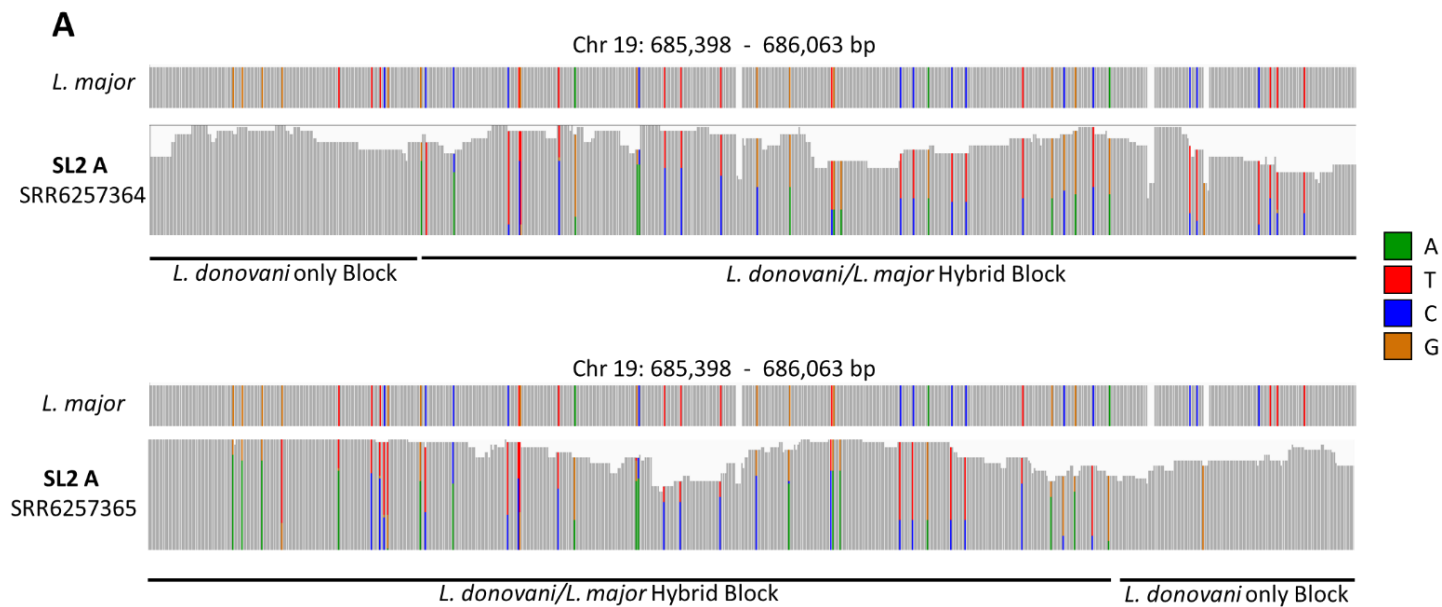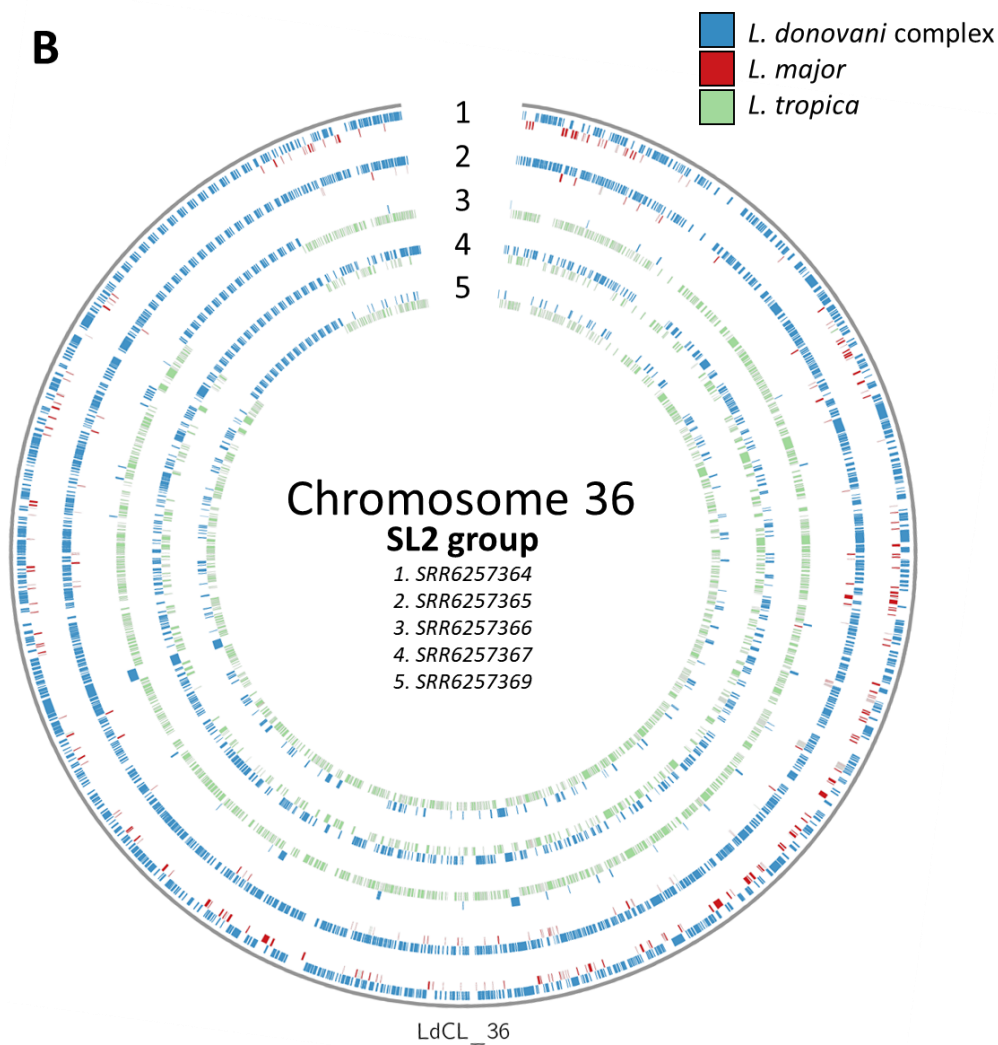

696 **Figure 5. Chromosomal recombination in *L. donovani* hybrid strains with *L. major* and *L. tropica***  
697 **A.** Representative alignment of genomes from two *L. major* hybrid parasites on the same section  
698 of chromosome 19 showing short length blocks of single (*L. donovani* only) or mixed parent  
699 ancestry (*L. donovani*/*L. major* hybrid). **B.** Representation of chromosome 36 in all isolates in the  
700 SL2 group. Each marker represents a single gene. Genes of *L. donovani* species complex origin  
701 are marked in blue. Genes with hybrid ancestry (*L. major* & *L. donovani*, or *L. tropica* & *L.*  
702 *donovani*) are colored in red and green respectively.

703

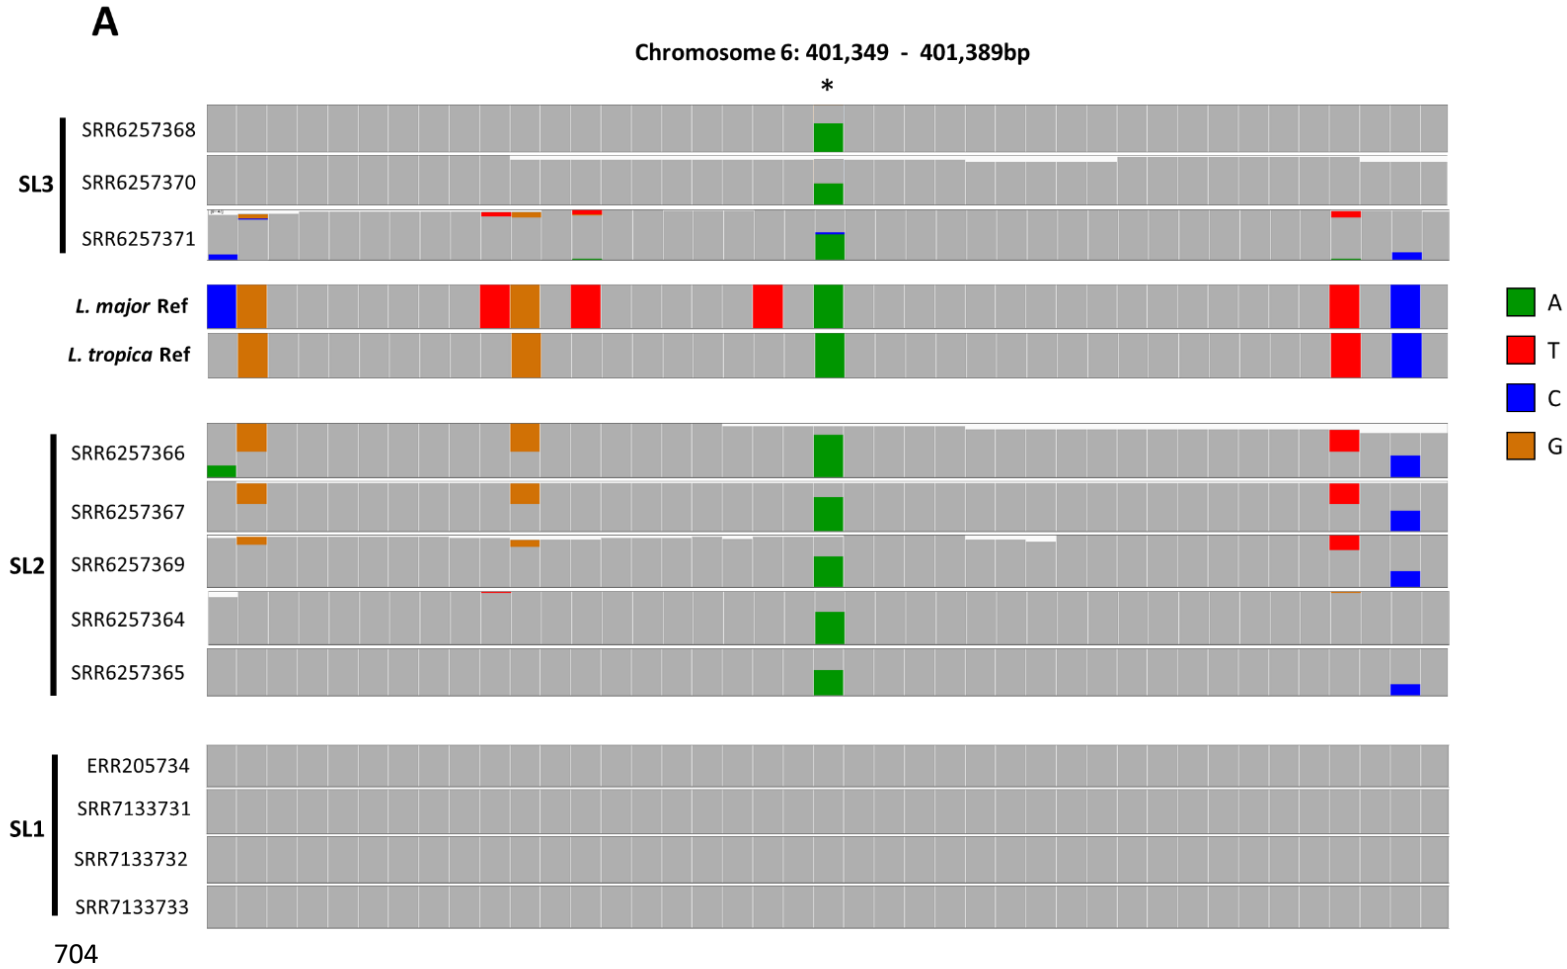



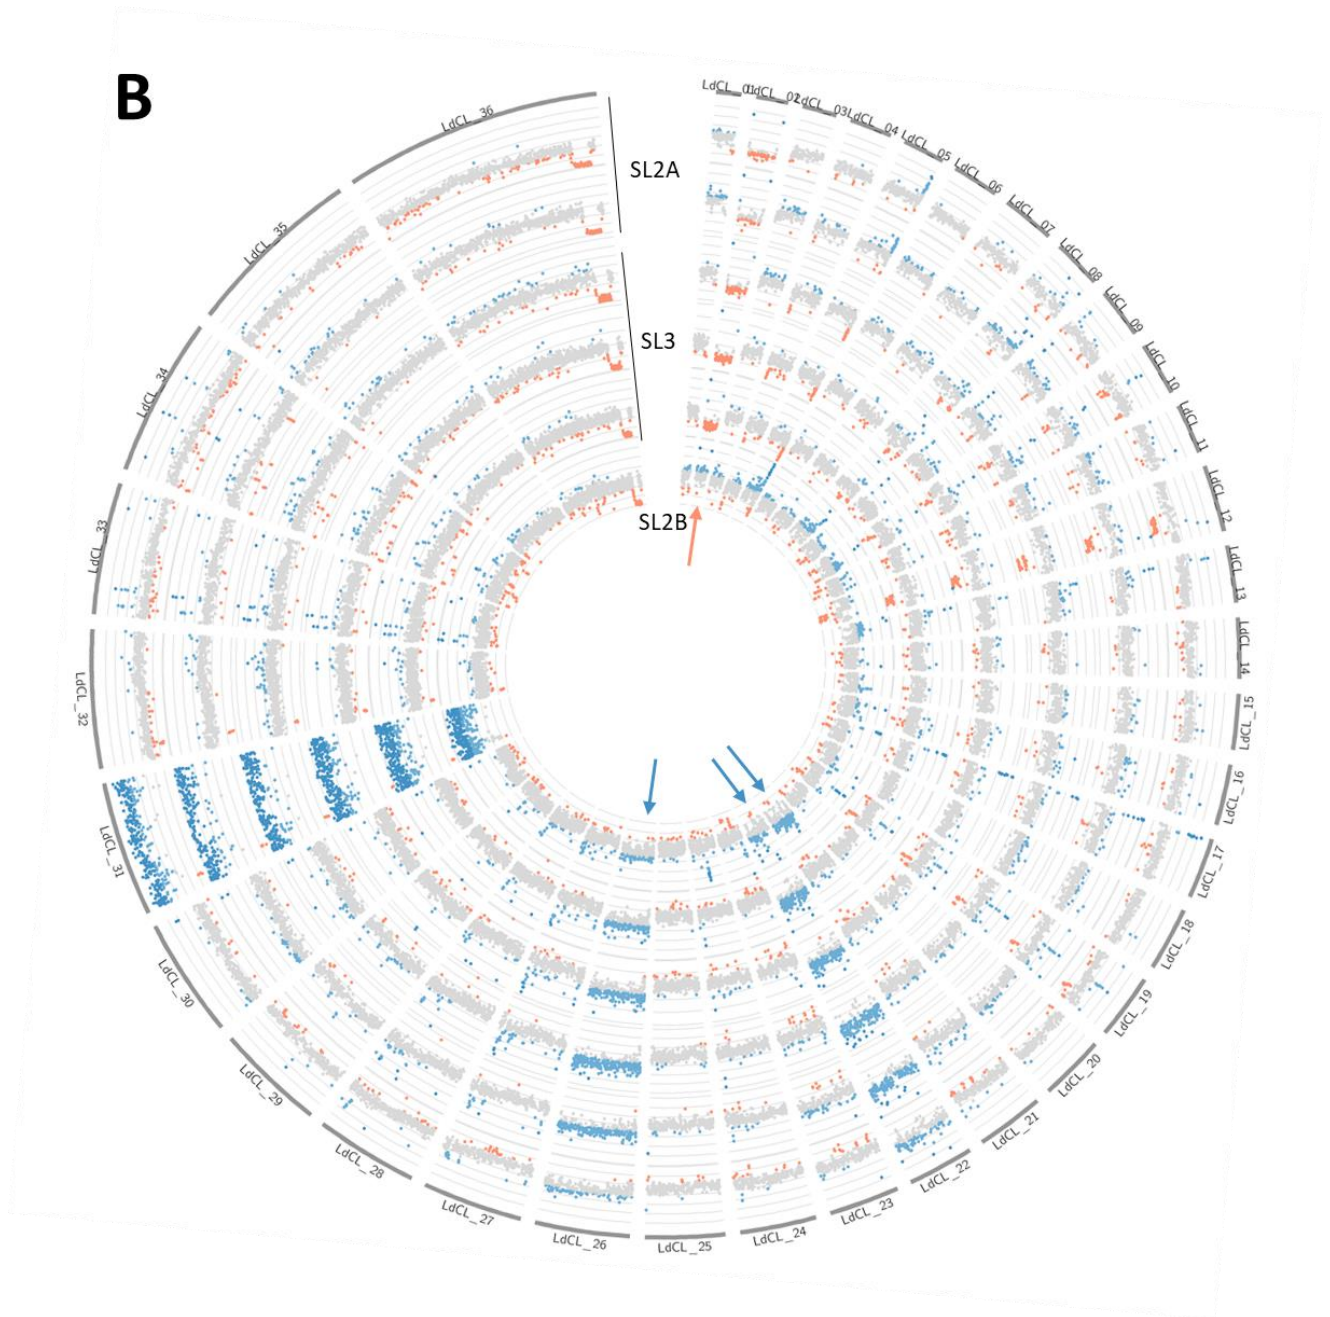

705

706 **Figure 6. Evidence of ancient hybridization in SL3 group samples.** A. Prevalence of  
707 polymorphisms across all Sri Lanka isolates on a portion of chromosome 6 compared with the  
708 reference *L. major* and *L. tropica* sequences. Grey boxes represent Sri Lanka reference *L.*  
709 *donovani* nucleotides. The SL3 group have retained varied levels of *L. major* alleles depending  
710 on the sample (upper 3 alignments). The SL2 group retained *L. major* or *L. tropica*

711 polymorphisms. The SL1 group does not share polymorphisms with either *L. tropica* or *L. major*.  
712 The polymorphism highlighted in the center (\*) of the alignment and retained in all SL2 and SL3  
713 isolates results in a Cys267Tyr change in the LdCL\_060014600 gene and matches the *L. major*  
714 allele, shows that some polymorphisms appear to be more stable in the hybrid genomes. **B.**  
715 Conservation of aneuploidy patterns across SL3 and SL2A group samples. Chromosomal  
716 coverage was determined and colored according to mean coverage (grey), decrease coverage  
717 (red) or increase coverage (blue) in sequencing depth. Coverage at each gene location across the  
718 entire genome shows the *L. major* hybrid isolates (SL2A) have reduced average copies of  
719 chromosome 2, and increased copy number of chromosome 22 and 26. The SL3 isolates show  
720 the same aneuploidy pattern as the *L. major* hybrids (SL2A). In comparison, SL2B *L. tropica*  
721 hybrid parasites have normal coverage at chromosome 2, a unique increase at chromosome 21,  
722 and share the increase across chromosomes 22 and 26. All isolates appear diploid for all other  
723 chromosomes with the exception of naturally tetraploid chromosome 31.

724

725 **Table 1. Old World *Leishmania* species genome matches after alternative allele gene**  
 726 **reconstruction**

|                      | SL2 A      |            | SL2 B      |            |            | SL3        |            |            | SL1       |            |            |            |
|----------------------|------------|------------|------------|------------|------------|------------|------------|------------|-----------|------------|------------|------------|
|                      | SRR6257364 | SRR6257365 | SRR6257366 | SRR6257367 | SRR6257369 | SRR6257368 | SRR6257370 | SRR6257371 | ERR205734 | SRR7133731 | SRR7133732 | SRR7133733 |
| <i>L. donovani</i>   | 3821****   | 4979****   | 662****    | 2871****   | 1711****   | 6492****   | 6495****   | 6475****   | 8012      | 8012       | 8011       | 8015       |
| <i>L. infantum</i>   | 1770       | 2214       | 296        | 1404       | 860        | 2942****   | 2940****   | 2958****   | 1423      | 1423       | 1424       | 1420       |
| <i>L. major</i>      | 3738****   | 2160****   | 230        | 203        | 227        | 47         | 46         | 50         | 46        | 46         | 46         | 46         |
| <i>L. tropica</i>    | 93         | 115        | 7671****   | 4568****   | 5977****   | 112        | 112        | 110        | 111       | 111        | 111        | 111        |
| <i>L. aethiopia</i>  | 6          | 6          | 412        | 317        | 496        | 0          | 0          | 0          | 0         | 0          | 0          | 0          |
| <i>L. arabica</i>    | 1          | 2          | 8          | 5          | 5          | 0          | 0          | 0          | 0         | 0          | 0          | 0          |
| <i>L. gerbilli</i>   | 33         | 21         | 66         | 33         | 69         | 0          | 0          | 0          | 0         | 0          | 0          | 0          |
| <i>L. enriettii</i>  | 0          | 0          | 0          | 0          | 0          | 0          | 0          | 0          | 0         | 0          | 0          | 0          |
| <i>L. tarentolae</i> | 7          | 6          | 16         | 15         | 16         | 6          | 6          | 6          | 6         | 6          | 6          | 6          |
| <i>L. turanica</i>   | 288        | 254        | 396        | 341        | 396        | 158        | 158        | 158        | 159       | 159        | 159        | 159        |

727

728 **Table 1.** Cumulative results of the best scoring species matches from genome wide BLAST  
 729 searches using alternative allele gene reconstruction. In every sample, each gene across the  
 730 genome was modified to reflect the sample polymorphism. These genes were then compared to  
 731 the complete reference genomes of all Old World *Leishmania* species and the highest scoring  
 732 alignment per gene was counted as one species match for that sample. Significant changes  
 733 compared to the SL1 group are marked with \*, \*\*, \*\*\* or \*\*\*\* to denote  $p < 0.05$ ,  $p < 0.01$ ,  
 734  $p > 0.001$ ,  $p < 0.0001$  respectively based on 2-way ANOVA with multiple comparisons within each  
 735 row.

736

737 **Table 2. Old World *Leishmania* strains genome matches after alternative allele gene**  
 738 **reconstruction**

|                | SL2 A      |            | SL2 B      |            |            | SL3        |            |            | SL1       |            |            |            |
|----------------|------------|------------|------------|------------|------------|------------|------------|------------|-----------|------------|------------|------------|
|                | SRR6257364 | SRR6257365 | SRR6257366 | SRR6257367 | SRR6257369 | SRR6257368 | SRR6257370 | SRR6257371 | ERR205734 | SRR7133731 | SRR7133732 | SRR7133733 |
| LdCL           | 290****    | 291****    | 262****    | 445****    | 259****    | 306****    | 340****    | 331****    | 4608      | 4748       | 4695       | 4751       |
| LdBPK282       | 141****    | 156****    | 80****     | 311****    | 83****     | 191****    | 217****    | 205****    | 2772      | 2646       | 2695       | 2646       |
| LdLV9          | 3389****   | 4531****   | 318*       | 2112*      | 1369*      | 5995****   | 5938****   | 5938****   | 629       | 615        | 618        | 615        |
| LdBHU_1<br>220 | 1          | 1          | 2          | 3          | 0          | 0          | 0          | 1          | 3         | 3          | 3          | 3          |
| LinJPCM5       | 1770       | 2214       | 296        | 1404       | 860        | 2942****   | 2940****   | 2958****   | 1423      | 1423       | 1424       | 1420       |
| LmjF           | 1365**     | 666**      | 23         | 14         | 23         | 0          | 0          | 0          | 0         | 0          | 0          | 0          |
| LmjSD75        | 1932****   | 1231****   | 190        | 175        | 190        | 47         | 46         | 50         | 46        | 46         | 46         | 46         |
| LmjLV39        | 441        | 264        | 17         | 14         | 14         | 0          | 0          | 0          | 0         | 0          | 0          | 0          |
| LtrL590        | 93         | 115        | 7671       | 4568****   | 5977****   | 112        | 112        | 110        | 111       | 111        | 111        | 111        |

739

740 **Table 2.** Cumulative results of the best scoring strain matches from genome wide BLAST  
 741 searches using alternative allele gene reconstruction. In every sample, each gene across the  
 742 genome was modified to reflect the sample polymorphism. These genes were then compared to  
 743 the complete reference genomes of all Old World *Leishmania* strains and the highest scoring  
 744 alignment per gene was counted as one strain match for that sample. Significant changes  
 745 compared to the SL1 group are marked with \*, \*\*, \*\*\* or \*\*\*\* to denote  $p < 0.05$ ,  $p < 0.01$ ,  
 746  $p > 0.001$ ,  $p < 0.0001$  respectively based on 2-way ANOVA with multiple comparisons within each  
 747 row.

748

749
